1 **Mutations in *fbiD* (Rv2983) as a novel determinant of resistance to pretomanid and**  
2 **delamanid in *Mycobacterium tuberculosis***

3

4 Dalin Rifat<sup>1</sup>, Si-Yang Li<sup>1</sup>, Thomas Ioerger<sup>2</sup>, Keshav Shah<sup>1</sup>, Jean-Philippe Lanoix<sup>1,3</sup>, Jin Lee<sup>1</sup>,  
5 Ghader Bashiri<sup>4</sup>, James Sacchettini<sup>5</sup> and Eric Nuermberger<sup>1\*</sup>

6 <sup>1</sup> Center for Tuberculosis Research, Johns Hopkins University School of Medicine, 1550

7 Orleans Street, Baltimore, MD 21287, USA

8 <sup>2</sup> Department of Computer Science, Texas A&M University, College Station, TX, 77843, USA

9 <sup>3</sup> Department of Infectious Diseases, Amiens University Hospital, Amiens, France

10 <sup>4</sup> Laboratory of Structural Biology and Maurice Wilkins Center for Molecular Biodiscovery,  
11 School of Biological Sciences, University of Auckland, Auckland 1010, New Zealand

12 <sup>5</sup> Department of Biochemistry and Biophysics, Texas A&M University, College Station, TX,  
13 77843, USA

14

15 \*Corresponding author. Email: [enuermb@jhmi.edu](mailto:enuermb@jhmi.edu) Tel: 410-502-7683

16

17

18

19 Running title: Rv2983 mutations and nitroimidazole resistance

20 **ABSTRACT**

21 The nitroimidazole pro-drugs delamanid and pretomanid comprise one of only two new  
22 antimicrobial classes approved to treat tuberculosis (TB) in 50 years. Prior *in vitro* studies  
23 suggest a relatively low barrier to nitroimidazole resistance in *Mycobacterium tuberculosis*, but  
24 clinical evidence is limited to date. We selected pretomanid-resistant *M. tuberculosis* mutants in  
25 two mouse models of TB using a range of pretomanid doses. The frequency of spontaneous  
26 resistance was approximately  $10^{-5}$  CFU. Whole genome sequencing of 161 resistant isolates  
27 from 47 mice revealed 99 unique mutations, 91% of which occurred in 1 of 5 genes previously  
28 associated with nitroimidazole activation and resistance: *fbiC* (56%), *fbiA* (15%), *ddn* (12%), *fgd*  
29 (4%) and *fbiB* (4%). Nearly all mutations were unique to a single mouse and not previously  
30 identified. The remaining 9% of resistant mutants harbored mutations in *Rv2983*, a gene not  
31 previously associated with nitroimidazole resistance but recently shown to be a  
32 guanylyltransferase necessary for cofactor  $F_{420}$  synthesis. Most mutants exhibited high-level  
33 resistance to pretomanid and delamanid, although *Rv2983* and *fbiB* mutants exhibited high-level  
34 pretomanid resistance, but relatively small changes in delamanid susceptibility. Complementing  
35 an *Rv2983* mutant with wild-type *Rv2983* restored susceptibility to pretomanid and delamanid.  
36 By quantifying intracellular  $F_{420}$  and its precursor  $F_0$  in overexpressing and loss-of-function  
37 mutants, we provide further evidence that *Rv2983* is necessary for  $F_{420}$  biosynthesis. Finally,  
38 *Rv2983* mutants and other  $F_{420}H_2$ -deficient mutants displayed hypersusceptibility to some  
39 antibiotics and to concentrations of malachite green found in solid media used to isolate and  
40 propagate mycobacteria from clinical samples.

41

42

## 43 INTRODUCTION

44 *Mycobacterium tuberculosis* remains the leading killer among infectious agents plaguing  
45 mankind, causing an estimated 1.45 million deaths in 2018 (1). The emergence and spread of  
46 rifampin-resistant (RR), multidrug-resistant (MDR) and extensively drug-resistant (XDR) *M.*  
47 *tuberculosis* makes tuberculosis (TB) control much more difficult. Detection of, and  
48 discrimination between, these forms of resistant TB requires laboratory confirmation of TB by  
49 rapid molecular test or culture and additional genotypic or phenotypic DST. Only approximately  
50 one-third of the estimated number of RR/MDR/XDR-TB cases are detected and initiated on  
51 treatment. Depending on the drug resistance profile, treatment has required administration of  
52 more toxic and less effective second- and third-line drugs for at least 9 months and up to 2  
53 years (1, 2).

54  
55 Delamanid and pretomanid are promising new bicyclic 4-nitroimidazole drugs that represent one  
56 of only two novel antimicrobial classes approved for clinical use against TB in 50 years. They  
57 have shown potential in pre-clinical and clinical studies to shorten and simplify the treatment of  
58 TB, including drug-resistant forms (3-10). Delamanid received conditional approval by the  
59 European Medicines Agency to treat MDR-TB in 2014 (11) but has had relatively limited clinical  
60 use to date. Pretomanid was recently approved by the U.S. Food and Drug Administration for  
61 treatment of MDR/XDR-TB as part of a novel oral, short-course regimen with bedaquiline and  
62 linezolid that produced favorable treatment outcomes in 90% of trial participants (4, 9).

63  
64 Pretomanid and delamanid are prodrugs that require bioreductive activation of their aromatic  
65 nitro group by the mycobacterial 8-hydroxy-5-deazaflavin (coenzyme  $F_{420}$ )-dependent  
66 nitroreductase Ddn in order to exert bactericidal activity (12). The reaction involves the transfer  
67 of two-electron hydride from the reduced form of cofactor  $F_{420}$  ( $F_{420}H_2$ ) produced by an  $F_{420}$ -  
68 dependent glucose-6-phosphate dehydrogenase (Fgd), the only enzyme known in mycobacteria

69 to reduce F<sub>420</sub> (13-15). Therefore, F<sub>420</sub> biosynthesis and reduction by Fgd are essential for  
70 activation of delamanid and pretomanid. Three genes are known to be essential for F<sub>420</sub>  
71 biosynthesis in *M. tuberculosis* complex (16, 17). *fbiC* encodes a 7,8-didemethyl-8-hydroxy-5-  
72 deazariboflavin (Fo) synthase that catalyzes the condensation of 5-amino-6-ribitylamino-2,4 (1*H*,  
73 3*H*)-pyrimidinedione and tyrosine to form the F<sub>420</sub> precursor Fo (18, 19). *fbiA* encodes a  
74 transferase that is now known to catalyze the transfer of a phosphoenolpyruvyl moiety to Fo to  
75 generate dehydro-F<sub>420</sub>-0, while *fbiB* encodes a bifunctional enzyme that reduces dehydro-F<sub>420</sub>-0  
76 and then catalyzes the sequential addition of a variable number of glutamate residues to F<sub>420</sub>-0  
77 to yield coenzyme F<sub>420</sub>-5 or -6 in mycobacteria (20). A fourth gene, MSMEG\_2392, was shown  
78 to be necessary for F<sub>420</sub> synthesis, but not Fo synthesis, in *Mycobacterium smegmatis* (21). Its  
79 homologue in *M. tuberculosis*, Rv2983, was recently cloned and purified to perform an *in vitro*  
80 assay to generate dehydro-F<sub>420</sub>-0 by using purified Rv2983 and FbiA, GTP,  
81 phosphoenolpyruvate (PEP) and Fo followed by binding study of PEP with the crystallized  
82 Rv2983, which proved Rv2983 to be a PEP guanylyltransferase (designated FbiD) that  
83 synthesizes the phosphoenolpyruvyl moiety that is subsequently transferred to Fo by FbiA (20).  
84 However, whether Rv2983, now known as *fbiD*, is essential for F<sub>420</sub> biosynthesis in *M.*  
85 *tuberculosis* awaits confirmation. Furthermore, it remains unknown whether Rv2983 is  
86 necessary for the activation of pretomanid and delamanid.

87  
88 A variety of loss-of-function mutations in *ddn*, *fgd* and *fbiA-C* causing delamanid and pretomanid  
89 resistance are readily selected *in vitro* in *M. tuberculosis* complex (17, 19, 22-24). However, a  
90 recent study found that 17% of the resistant isolates selected *in vitro* by pretomanid harbored no  
91 mutations in these genes (23). Furthermore, there has been no comprehensive study of  
92 evolution of resistance *in vivo* during treatment with either agent. Given that clinical usage of  
93 delamanid and pretomanid is increasing and fitness costs arising from resistance mutations may  
94 differ between *in vitro* and *in vivo* conditions, the paucity of data relating to the emergence of

95 resistance *in vivo* is alarming. Therefore, we set out to study bacterial genetic, host and  
96 pharmacological factors associated with emergence of nitroimidazole resistance in two murine  
97 models of TB. In so doing, we identified loss-of-function mutations in *Rv2983* as a novel  
98 determinant of pretomanid and delamanid cross-resistance and proved its essentiality for F<sub>420</sub>  
99 biosynthesis in *M. tuberculosis*, findings that support its role as FbiD in the recently revised F<sub>420</sub>  
100 biosynthesis pathway. We also characterized additional phenotypes of the *Rv2983* mutants,  
101 showing them to be hypersensitive to some stress conditions and antibiotics, and to malachite  
102 green (MG), an organic compound used as a selective decontaminant in solid media for  
103 culturing *M. tuberculosis*. The latter finding raises important concerns that isolation and  
104 propagation of nitroimidazole-resistant mutants from clinical samples may be adversely affected  
105 by use of some MG-containing media, such as Lowenstein-Jensen media. Together, these  
106 findings have important implications for the development of both genotypic and phenotypic  
107 methods for detection of nitroimidazole resistance in clinical samples.

108

## 109 RESULTS

### 110 Spontaneous pretomanid-resistant mutants exist at a relatively high frequency in 111 infected mice and are selectively amplified by treatment with active doses of pretomanid.

112 To study the dose-response of pretomanid and explore the genetic spectrum of nitroimidazole  
113 resistance selected *in vivo*, we established chronic *M. tuberculosis* infections in mice and then  
114 treated with a range of pretomanid doses spanning the clinical exposure range for up to 8  
115 weeks. Because the lungs of TB patients feature a heterogeneous array of lesion types resulting  
116 in diverse microenvironments and pharmacological compartments that alter the drug  
117 susceptibility and drug exposure of resident tubercle bacilli (25, 26), we used both C3HeB/FeJ  
118 mice, which develop caseating lung lesions in response to infection, and BALB/c mice, which do  
119 not, to investigate the impact of host pathology on mutant selection. Despite lower CFU counts  
120 on the day after infection (W-8) in C3HeB/FeJ mice (1.67 log<sub>10</sub> CFU per lung) compared to

121 BALB/c ( $2.26 \log_{10}$ ) ( $p < 0.001$ ), higher CFU counts were observed in C3HeB/FeJ mice 8 weeks  
122 later, on the day treatment started (D0), and after 3 weeks of treatment in almost all groups ( $p$   
123  $< 0.001 - 0.05$ ) (Fig. 1A), consistent with the greater susceptibility of this strain to *M. tuberculosis*  
124 infection. Three C3HeB/FeJ mice treated with 1000 mg/kg required euthanasia during the  
125 second week of treatment, prompting a dose reduction from 1000 mg/kg to 600 mg/kg in both  
126 strains. Nevertheless, a clear pretomanid dose-response relationship was observed in both  
127 mouse strains after 3 weeks of treatment (Fig. 1A). The three remaining C3HeB/FeJ mice  
128 treated with 600 mg/kg beyond the week 3 time point were euthanized after 5 weeks of  
129 treatment due to toxicity. One had no detectable CFU and two had  $\leq 2.0 \log_{10}$  CFU of  
130 pretomanid-resistant *M. tuberculosis*. After 8 weeks of treatment, total CFU counts fell in a  
131 dose-dependent manner in BALB/c mice before a plateau was reached at doses  $\geq 300$  mg/kg,  
132 where resistant CFU were higher and replaced the susceptible CFU ( $p < 0.05$ ) (Fig. 1B).  
133 Spontaneous pretomanid-resistant CFU comprised approximately  $10^{-5}$  of the total CFU in the  
134 absence of drug pressure in untreated BALB/c mice and the proportion of the total CFU that  
135 was comprised of pretomanid-resistant CFU increased with dose up to the 300 mg/kg dose  
136 group. Dose-dependent bactericidal activity was also observed in C3HeB/FeJ mice (Fig. 1C).  
137 However, selective amplification of pretomanid-resistant mutants was more extensive and  
138 occurred at lower doses than in BALB/c mice (Fig. 1B and 1C). We were not able to measure  
139 the spontaneous frequency of resistant mutants in untreated C3HeB/FeJ mice because they  
140 succumbed to infection prior to week 8. Pretomanid-resistant CFU replaced susceptible CFU in  
141 C3HeB/FeJ mice receiving doses as low as 30 mg/kg and pretomanid-resistant CFU counts  
142 were roughly 10 times higher in C3HeB/FeJ mice compared to BALB/c mice (Fig. 1B and C),  
143 which indicates greater potential for selective amplification of pretomanid resistance with  
144 monotherapy in this strain. Most resistant isolates grew on plates containing 10  $\mu\text{g/ml}$  of  
145 pretomanid, but some had fewer CFU on plates containing 10  $\mu\text{g/ml}$  than on those containing 1  
146  $\mu\text{g/ml}$  of pretomanid.

147

148 **Whole genome sequencing of pretomanid-resistant mutants revealed diverse mutations**  
149 **in *Rv2983* or in one of five other genes known to be required for pretomanid activation.**

150 To characterize mutations associated with pretomanid resistance *in vivo*, we performed WGS  
151 on 136 individual pretomanid-resistant colonies and 25 colony pools picked from 47 individual  
152 mice harboring pretomanid-resistant CFU after 8 weeks of treatment (Table S2-S4). Each  
153 individual isolate had an isolated mutation in one of the 5 genes previously shown to be required  
154 for pretomanid activation or in *Rv2983*, a gene not previously associated with nitroimidazole  
155 resistance. Overall, 99 unique and diverse mutations in these 6 genes were identified. Each  
156 mouse lung harbored 1 to 4 unique mutations. Except for a few mutations (K9N (*fgd*), R322L  
157 (*fbiC*) and Q120P (*fbiA*)) shared by two mice each, no two mice harbored the same mutation.  
158 Moreover, comparing the 99 unique mutations identified in our study with the 151 unique  
159 mutations in the 5 previously recognized genes selected *in vitro* (23), only 4 mutations were  
160 found in the same position and only the W79 stop (*fbiA*) and N336K (*fbiC*) mutations were found  
161 in both datasets. In our pooled samples, mutations in all the genes mentioned above were  
162 detected except mutations in *fbiB* (Table S5). Taken together, these data reveal a remarkably  
163 large “target size” for chromosomal mutations conferring resistance to nitroimidazole pro-drugs  
164 *in vivo* as well as *in vitro*.

165

166 In both BALB/c and C3HeB/FeJ mice, more than half of the resistant isolates were *fbiC* mutants  
167 (56%) (Fig. 2A). For the other five genes, the rank order by mutation frequency was *Rv2983*  
168 (13%) and *fbiA* (13%) > *ddn* (9%) > *fbiB* (6%) > *fgd* (4%) in BALB/c mice (Fig.2B and Table S5)  
169 and *fbiA* (18%) > *ddn* (16%) > *fgd* or *Rv2983* (4%) > *fbiB* (2%) in C3HeB/FeJ mice (Fig.2C and  
170 Table S5). No significant differences in mutation frequencies between BALB/c and C3HeB/FeJ  
171 mice were observed, although a trend towards more *Rv2983* mutations in BALB/c mice (7/54,  
172 13% of all mutations) compared to C3HeB/FeJ mice (2/45, 4%) was detected. The mutations

173 identified in *Rv2983* included 8 point mutations resulting in the following amino acid  
174 substitutions: R25S, R25G, A68E, A132V, G147C, C152R, Q114R and A198P, as well as an  
175 insertion of C after A27 and a deletion of I129 (-ATC) (Tables S2-S4). There were no clear  
176 associations between pretomanid dose or concentration and the mutated gene. Mutations in  
177 *fbiC* comprised a higher proportion of those selected in our *in vivo* study compared to the  
178 proportion selected in a previous *in vitro* study (26%,  $p = 0.0001$ ) (23), implying that such  
179 mutants may have superior fitness *in vivo* relative to other mutants. On the other hand,  
180 mutations in *ddn* (29%) were more frequent after *in vitro* selection than in our mouse models  
181 (12%) ( $p = 0.001$ ). *In vitro* mutation frequencies for *fbiA*, *fgd* and *fbiB* (19%, 7% and 2%,  
182 respectively) were similar to our findings in mice.

183  
184 Among the 99 unique mutations, all but one (an IS6110 insertion located in 85-bp upstream of  
185 the *fbiC* coding sequence in isolate KA-026a) (Table S3) were found within the coding regions  
186 of the six genes. In total, 54% (53/99) were non-synonymous point mutations (no synonymous  
187 point mutations were identified), 35% (35/99) were insertions or deletions (indels), and 11%  
188 (11/99) were substitutions resulting in a new stop codon (Fig.2A and Table S5). No significant  
189 difference in the distribution of point mutations and indels was found between ours and the *in*  
190 *vitro* study by Haver, *et al.* However, the frequency of stop codon substitutions in the latter study  
191 (26%, 40/151) was higher than that observed in the present study (11%, 11/99) ( $p = 0.004$ ), 85%  
192 (34/40) of which were in *ddn* in the latter study (23).

193  
194 **Mutations in *Rv2983* cause resistance to pretomanid and delamanid.** To prove that loss-of-  
195 function mutations in *Rv2983* are sufficient for nitroimidazole resistance, merodiploid  
196 complemented strains were constructed by introducing a copy of the wild type *Rv2983* gene into  
197 B101, an *Rv2983* mutant (A198P), through site-specific integration (27, 28). Susceptibility  
198 testing confirmed significantly higher nitroimidazole MICs against the *Rv2983* mutant and full



199 restoration of susceptibility in the complemented strains. Remarkably, however, the upward shift  
200 in pretomanid MIC (i.e., >128x) associated with this mutation was significantly greater than the  
201 shift in delamanid MIC (i.e., 8x), and the delamanid MIC of 0.06 µg/ml against the *Rv2983*  
202 mutant was the same as the recommended critical concentration for susceptibility testing in  
203 MGIT medium (29). MICs were determined against additional isolates with mutations in each of  
204 the 6 genes (Table 1). Interestingly, whereas mutations in *fbiC*, *fbiA*, *fgd* and *ddn* were often  
205 associated with high-level resistance to both pretomanid and delamanid, both *Rv2983* and *fbiB*  
206 mutants exhibited high-level pretomanid resistance while delamanid MICs hovered around the  
207 MGIT breakpoint of 0.06 µg/ml, or more than 100 times lower than delamanid MICs against *ddn*  
208 mutants and most other *fgd* and  $F_{420}$  biosynthesis mutants. The sole exception was an *Rv2983*  
209 frameshift mutant (BA019a) that exhibited high-level resistance to both compounds.

210

211 ***Rv2983* is required for  $F_{420}$  biosynthesis.** To demonstrate that *Rv2983* is required for  $F_{420}$   
212 biosynthesis, we measured the production of Fo and  $F_{420}$  in *M. smegmatis* strains  
213 overexpressing *Rv2983* and in *M. tuberculosis* *Rv2983* mutant strains compared with their  
214 corresponding control strains. Previous studies in *Mycobacterium bovis* BCG showed no  
215 detected Fo or  $F_{420}$  in an *fbiC* mutant, detected Fo with no detected  $F_{420}$  in an *fbiA* mutant or with  
216 only a small amount of  $F_{420}$ -0 detected only in an *fbiB* mutant (17, 19). In the current study,  
217 *Rv2983* was cloned into the IPTG-inducible expression vector pYUBDuet and *pfbic* (designated  
218 p*Rv2983* and p*fbiC-Rv2983*, respectively), followed by successful transformation of *M.*  
219 *smegmatis*, along with pYUBDuet and p*fbiABC* controls. Relative fluorescence was assessed in  
220 these strains compared to the control strain containing the empty vector pYUBDuet.  
221 Overexpression of *Rv2983* in *M. smegmatis* increased  $F_{420}$  production but resulted in little  
222 change in Fo production compared to the control strain after 6 and 26 hours of induction with  
223 IPTG (Figs. 3A and 3B). As expected, mutation of *Rv2983* in the *M. tuberculosis* B101 mutant  
224 markedly reduced  $F_{420}$  production, resulting in accumulation of Fo relative to the wild-type.

225 Complementation fully restored the wild-type phenotype (Figs. 3C and 3D). Overexpression of  
226 *fbiC* in *M. smegmatis* increased Fo and, consequently, F<sub>420</sub> concentrations, as expected.  
227 Relative to the control strain, F<sub>420</sub> concentrations were similar when either *fbiC* or *Rv2983* was  
228 over-expressed alone (Fig. 3A). Interestingly, when *Rv2983* was co-overexpressed with *fbiC*, a  
229 dramatic increase in F<sub>420</sub> was observed relative to over-expression of either gene alone (3.4 and  
230 3.1-fold, respectively) after 6 hours of IPTG induction ( $p < 0.001$ ), with corresponding significant  
231 decreases of Fo levels after 6 and 26 hours of IPTG induction (5.8 and 3.1-fold;  $p < 0.005$  and  
232 0.05, respectively), which were similar to the results of co-overexpression of *fbiA*, *fbiB* and *fbiC*  
233 as a positive control (Fig. 3A and 3B). These results suggest that the excess Fo produced by  
234 *fbiC* over-expression was efficiently converted to F<sub>420</sub> by over-expressed *Rv2983*. On the other  
235 hand, although a small amount of F<sub>420</sub> was observed in cell extracts of two *Rv2983* point  
236 mutants (B101 [A198P] and KA016 [Q114R]), their F<sub>420</sub> content was significantly lower than that  
237 of the wild type (7.3 and 7.7-fold) ( $p < 0.001$ ) and complemented B101 mutant (Fig. 3C). As  
238 expected, Fo accumulated in the two *Rv2983* mutant strains relative to the wild-type (6.7 and  
239 6.5-fold;  $p < 0.05$  and 0.005, respectively) (Fig. 3D), indicating that Fo was not efficiently  
240 converted to F<sub>420</sub> in the presence of a mutated *Rv2983*. Two other pretomanid-resistant strains  
241 were also assessed as controls. The KA026 mutant with an IS6110 insertion 85 bp upstream of  
242 *fbiC* had undetectable Fo and very little F<sub>420</sub> content, while the KA91 mutant with an IS6110  
243 insertion at amino acid position 108 of Ddn showed a wild-type phenotype with respect to F<sub>420</sub>  
244 and Fo concentrations (Figs. 3C and D).

245

246 ***Rv2983* is necessary for resistance to oxidative stress and progressive hypoxia but not**  
247 **for growth and survival in BALB/c mice.** An F<sub>420</sub>-deficient *fbiC* mutant of *M. tuberculosis* was  
248 previously shown to be hypersensitive to oxidative stress (30, 31). To investigate the importance  
249 of *Rv2983* under oxidative stress, the wild-type H37Rv, the *Rv2983* mutant (B101) and two  
250 complemented strains (B101-p*Rv2983* and B101-p*hsp60-Rv2983*) were exposed to 20  $\mu$ M and

251 100  $\mu$ M of menadione. In the absence of menadione, no significant difference in growth kinetics  
252 was observed between strains (Fig. S4), confirming that *Rv2983* and *F*<sub>420</sub> are dispensable for  
253 growth in nutrient-rich 7H9 broth. However, the *Rv2983* mutant was markedly more susceptible  
254 to menadione (Fig. 4A-B).

255 *M. tuberculosis* encounters hypoxia and enters a state of non-replicating persistence in closed  
256 caseous foci in diseased lungs (32). In order to evaluate whether *Rv2983* is necessary for such  
257 persistence, the same strains were studied in a model of progressive hypoxia *in vitro*. After 17  
258 days, the change in color of the methylene blue (from blue to yellow) indicated the onset of  
259 oxygen deprivation (designated day 0) (Fig. 4C). While there was no difference in the CFU  
260 counts between strains at day 0, the viability of the *Rv2983* mutant decreased more rapidly over  
261 the ensuing 10 and 21 days ( $p < 0.05$  and 0.001, respectively) (Fig. 4C).

262  
263 Resistance-conferring mutations may confer fitness defects *in vivo*. However, *F*<sub>420</sub>-deficient  
264 mutants have not been well studied in an animal model. In order to understand the effect of  
265 *Rv2983* mutations on *M. tuberculosis* virulence *in vivo*, the same strains were subjected to low-  
266 dose aerosol infection of BALB/c mice and monitored over the next 4 months. No significant  
267 differences in lung CFU counts between the wild-type and the mutant strains were observed  
268 (Fig.4D). Similar results were also observed for mouse body, lung and spleen weights (Fig.S5)  
269 and lung histopathology, which demonstrated the expected cellular granulomas comprised of  
270 histiocytes, foamy macrophages and lymphocytes on day 112 post-infection (Fig. S6). The  
271 attenuation of an *Rv2983* mutant in the progressive hypoxia model and the trend towards fewer  
272 *Rv2983* mutations in C3HeB/FeJ mice (2/45, 4% of all mutations) compared to BALB/c mice  
273 (7/54, 13%) suggests that it may be worthwhile to investigate the role of *Rv2983* in *M.*  
274 *tuberculosis* virulence using C3HeB/FeJ mice in a future study.

275

276 **A F<sub>420</sub>-deficient pretomanid-resistant Rv2983 mutant is hypersusceptible to anti-TB**  
277 **drugs.** Previous studies provided evidence that F<sub>420</sub>H<sub>2</sub> may be necessary for full tolerance to a  
278 variety of anti-TB drugs, including isoniazid, rifampin, ethambutol, pyrazinamide, moxifloxacin  
279 and clofazimine in *Mycobacterium smegmatis* (33), and isoniazid, moxifloxacin and clofazimine  
280 in *M. tuberculosis* (30). In order to confirm that Rv2983 also contributes to tolerance to selected  
281 anti-TB drugs in *M. tuberculosis*, we performed time-kill assays exposing the wild-type, the  
282 Rv2983 mutant and the complemented strains to 5-10x MIC concentrations. The mutant proved  
283 more sensitive to isoniazid after 4 days of exposure (Fig. 5A). Interestingly, on day 7, the  
284 CFU/ml continued to decrease for the mutant, but the wild-type and the complemented strains  
285 showed re-growth suggesting that Rv2983 played a role in enabling outgrowth of INH-resistant  
286 mutants (Fig. 5A). The Rv2983 mutant was also hypersusceptible to linezolid, bedaquiline and  
287 clofazimine, phenotypes that were fully ameliorated with complementation (Fig. 5B-D).

288  
289 **F<sub>420</sub>-deficient pretomanid-resistant mutants are attenuated for growth in the presence of**  
290 **malachite green.** Malachite green (MG) is an organic compound used as a selective  
291 decontaminant in solid media for culturing *M. tuberculosis*. Previous work using *M. smegmatis*  
292 showed that mutations in MSMEG\_5126 (homolog of *fbiC*) and MSMEG\_2392 (which shares  
293 69% homology with Rv2983) reduce the ability to decolorize and detoxify MG, indicating that  
294 F<sub>420</sub> biosynthesis is necessary for this process (21). To evaluate the role of each gene  
295 associated with nitroimidazole activation in the resistance to MG, log-phase cultures of selected  
296 pretomanid-resistant mutants including the B101 mutant were plated on 7H9 agar  
297 supplemented with a range of MG concentrations. All mutants deficient in F<sub>420</sub> synthesis or F<sub>420</sub>  
298 reduction (*i.e.*, those with mutations in *fbiA-C*, Rv2983 or *fgd*) were more susceptible to MG,  
299 while the *ddn* mutant retained the same susceptibility as the wild type H37Rv parent (Fig. 6A).  
300 The lability of F<sub>420</sub>H<sub>2</sub> and lack of a commercial source for F<sub>420</sub> made it unfeasible to attempt to  
301 test whether provision of F<sub>420</sub>H<sub>2</sub> could rescue the MG-hypersusceptible phenotype of the F<sub>420</sub>H<sub>2</sub>-

302 deficient mutants. However, complementation of *Rv2983* nearly restored the wild-type growth  
303 phenotype in the B101 mutant, confirming that *Rv2983* is necessary for the intrinsic resistance  
304 of *M. tuberculosis* to MG (Fig. 6B). Interestingly, at MG concentrations above 6 µg/ml, greater  
305 recovery was observed when *Rv2983* was expressed behind the native promoter compared to  
306 the *hsp60* promoter, suggesting that unknown factors may play a regulatory role in MG  
307 detoxification (Fig. 6B). Longer incubation times and plating at higher bacterial density (500 µl  
308 rather than 100 µl of cell suspension per plate) significantly increased colony recovery (data not  
309 shown).

310

311 Because all solid media commonly used to isolate and cultivate *M. tuberculosis* in clinical  
312 laboratories contain MG as a selective decontaminant, the increased MG susceptibility  
313 conferred by mutations in *fbiA-C*, *Rv2983* and *fgd* could compromise the isolation and  
314 propagation (and hence identification) of nitroimidazole-resistant mutants from clinical samples.  
315 Commercial 7H10 agar, 7H11 agar and LJ medium contain 0.25, 1 and 400 µg/ml, respectively,  
316 of MG. To assess the potential impact of these media on the isolation of an F<sub>420</sub>H<sub>2</sub>-deficient  
317 pretomanid-resistant *Rv2983* mutant relative to an F<sub>420</sub>H<sub>2</sub>-sufficient, but still pretomanid-  
318 resistant, *ddn* mutant and the pretomanid-susceptible wild type and *Rv2983*-complemented  
319 mutant, we inoculated these media in parallel using serial dilutions of each strain. The *Rv2983*  
320 mutant exhibited 10 times lower CFU counts relative to other strains after 21 and 28 days of  
321 incubation on 7H10 agar plates ( $p < 0.01$ ) (Figs. 7A). The result after 35 days of incubation was  
322 generally similar between the mutant and the control strains (Fig. 7A). A similar semi-  
323 quantitative growth assessment of the *Rv2983* mutant on LJ media compared to other strains  
324 including a *ddn* mutant (K91, IS6110 ins in D108) revealed growth inhibition of the *Rv2983*  
325 mutant that was ameliorated by increasing the size of the bacterial inoculum from 10<sup>2</sup> to 10<sup>6</sup>  
326 CFU/ml and increasing the incubation time from 28 to 35 days (Fig. 7C). Interestingly, no

327 difference in growth was found on 7H11 agar (Fig. 7B), despite higher MG concentrations in that  
328 medium compared to 7H10.

329

## 330 **DISCUSSION**

331 As representatives of one of only two new drug classes approved for use against TB in the last  
332 50 years, delamanid and pretomanid are important and promising new drugs (3, 4, 6, 7, 9, 34)  
333 that are increasingly used to treat MDR/XDR-TB. Comprehensive knowledge of the spectrum of  
334 mutations conferring resistance to these drugs in *M. tuberculosis in vivo* and the resultant  
335 mutant phenotypes is critical for timely and accurate diagnosis of resistance and the design of  
336 optimal treatment regimens to promote the safe and effective use of these drugs in clinical  
337 settings. The present study reports several important new findings. First, we identified a novel  
338 nitroimidazole resistance determinant—loss-of-function mutations in *Rv2983*—that, in the case  
339 of our study, explained all of the pretomanid resistance that was not attributable to mutations in  
340 the 5 previously described genes. Together these 6 genes comprise a set of non-essential  
341 “targets” for spontaneous resistance mutations that is of unprecedented size for a TB drug and  
342 results in a relatively lower barrier to resistance compared to most other TB drugs, except  
343 perhaps isoniazid. Second, with one exception, *Rv2983* and *fbiB* mutants showed only low-level  
344 resistance to delamanid despite high-level resistance to pretomanid. This finding adds to a  
345 previous report associating *fbiB* mutations with low-level delamanid resistance (24) and,  
346 together with differences in how delamanid resistance has been defined, may explain why  
347 neither *fbiB* nor *Rv2983* mutants have yet been associated with delamanid resistance in clinical  
348 isolates (29, 35). Third, we provide additional evidence that *Rv2983* is required for F<sub>420</sub>  
349 biosynthesis in *M. tuberculosis* in support of its recently elucidated role as the  
350 guanlylyltransferase *fbiD* (20). Finally, we show that *Rv2983* is essential for tolerance of *M.*  
351 *tuberculosis* to MG, a selective decontaminant present in solid media used to cultivate *M.*  
352 *tuberculosis*, and show that clinical microbiology laboratories could encounter difficulties

353 recovering this and other F<sub>420</sub>H<sub>2</sub>-deficient nitroimidazole-resistant mutants from clinical  
354 specimens. For reasons that require further exploration, we observed superior recovery of  
355 F<sub>420</sub>H<sub>2</sub>-deficient mutants on 7H11 agar compared to 7H10 agar and LJ media, suggesting that  
356 7H11 agar may be the solid medium of choice for identification of nitroimidazole-resistant  
357 mutants in clinical and research settings.

358

359 Our study provides the first comprehensive analysis of the spectrum of nitroimidazole-resistant  
360 mutants selected *in vivo* and, because we used whole genome sequencing, it represents the  
361 most comprehensive analysis of pretomanid resistance mutations made to-date. The  
362 spontaneous frequency of resistance to nitroimidazoles in *M. tuberculosis* studied *in vitro* has  
363 ranged from 1 in 10<sup>5</sup> to 7 in 10<sup>7</sup> CFU (22-24, 36-38), which is consistent with our findings in the  
364 lungs of untreated BALB/c mice. The large “target size” for mutations in 6 non-essential genes  
365 drives this relatively high frequency, which is as high or higher than that for isoniazid and higher  
366 than for rifamycins and fluoroquinolones. Our unpublished observations suggest that similar  
367 frequencies of nitroimidazole-resistant mutants exist in sputum isolates collected from  
368 treatment-naïve, drug-susceptible TB patients. Delamanid-resistant *M. tuberculosis* has been  
369 recovered from patients both before and after delamanid treatment (11, 39-41). To date,  
370 emergence of resistance has not been described during use of pretomanid in clinical trials, but  
371 such use has been restricted to relatively short treatment durations and/or use in combination  
372 with highly active companion drugs. Pretomanid resistance has emerged during combination  
373 therapy in mouse models (3, 42). Thus, the relatively high frequency of spontaneous mutations  
374 conferring nitroimidazole resistance and available pre-clinical and clinical data underscore the  
375 importance of making validated DST for this class widely available as clinical usage expands.  
376 Moreover, our finding also emphasizes the importance of using nitroimidazoles in regimens with  
377 other effective anti-TB drugs to which infecting strains are susceptible, ideally taking advantage  
378 of the hypersusceptibility of F<sub>420</sub>H<sub>2</sub>-deficient mutants to many anti-TB drugs, as shown here and

379 elsewhere to restrict their selective amplification. Indeed, the use of pretomanid in highly active  
380 regimens under clinical trial conditions may be an important reason for the absence of  
381 treatment-emergent resistance to date.

382

383 The lungs of TB patients feature a heterogeneous array of lesion types, which possess diverse  
384 immune responses and cause differences in drug penetration (25, 26). C3HeB/FeJ mice  
385 develop caseating lung lesions and BALB/c mice form largely cellular lesions in response to *M.*  
386 *tuberculosis* infection. We observed selective amplification of F<sub>420</sub>H<sub>2</sub>-deficient mutants in mice  
387 over a range of pretomanid doses that included doses producing much higher drug exposures  
388 than those produced in patients. Amplification was especially pronounced at higher drug doses,  
389 which eliminated the nitroimidazole-susceptible population more rapidly, and in C3HeB/FeJ  
390 mice. Our finding suggests that microenvironments in C3HeB/FeJ mice favor the selective  
391 amplification of nitroimidazole-resistant mutants. Further study is needed to explain this finding,  
392 but pretomanid is expected to penetrate well into necrotic lesions and to exert activity under  
393 relatively hypoxic conditions. The more rapid selection of resistance in C3HeB/FeJ mice has  
394 been observed for other drugs and may have more to do with the larger bacterial loads and  
395 reduced host immune pressure in the caseating lesions. Fortunately, our study and others show  
396 that F<sub>420</sub> is crucial for mycobacterial tolerance to a range of antimicrobial compounds and that  
397 F<sub>420</sub>H<sub>2</sub>-deficient mycobacterial strains are more susceptible to first-line and second-line anti-TB  
398 drugs such as isoniazid, rifampin, pyrazinamide, ethambutol, moxifloxacin, bedaquiline, linezolid,  
399 clofazimine and other compounds including MG (30, 33). Combining pretomanid and delamanid  
400 with these drugs can be expected to counter the selection of F<sub>420</sub>H<sub>2</sub>-deficient nitroimidazole-  
401 resistant sub-populations by killing them more rapidly than wild type *M. tuberculosis* sub-  
402 populations, as suggested by recent preclinical studies (3).

403



404 Previous work identified 5 genes (*fbiA-C*, *fgd*, and *ddn*) involved in the activation pathway of  
405 nitroimidazole prodrugs in which mutations may confer drug resistance in *M. tuberculosis*  
406 complex (17, 19, 22-24, 38). Like the *in vitro* study by Haver *et al* (23), we found that isolated  
407 mutations in *fbiA-C*, *fgd*, or *ddn* explained the majority of the pretomanid-resistant isolates we  
408 selected. However, whereas their study left 17% of resistant isolates unexplained, we found that  
409 all of the remaining resistant isolates in our study, representing 9% of the total number of unique  
410 mutations, harbored mutations in *Rv2983*, a gene not previously implicated in nitroimidazole  
411 resistance. Indeed, the proportion of resistant isolates explained by *Rv2983* (9%) was similar to  
412 the proportion explained by *fbiA* (15%) and *ddn* (12%) mutations, which lagged only mutations  
413 in *fbiC* (56%) as the predominant cause of pretomanid resistance in our mice. Thus, the  
414 identification of *Rv2983* mutations should be included in rapid molecular DSTs and algorithms  
415 for the diagnosis of nitroimidazole resistance from genome sequence data. The 10 mutations in  
416 *Rv2983* identified in this study (Table S2-4) represent the first step in the process of identifying  
417 specific resistance-conferring mutations to inform test development. Although the *Rv2983*  
418 mutants caused a smaller upward shift in the delamanid MIC compared to the pretomanid MIC,  
419 our complementation study proves that *Rv2983* is also required for efficient delamanid  
420 activation. The delamanid MIC of 0.064 µg/ml against the mutant was still higher than the  
421 recently proposed critical concentration of 0.016 µg/ml (29). Interestingly, all of our *fbiB* mutants  
422 also demonstrated only low-level resistance to delamanid (2-8x increase in MIC) despite high-  
423 level pretomanid resistance (32-128x increase in MIC). Such low-level delamanid resistance with  
424 mutation of *fbiB* was also observed in *M. bovis* BCG by Fujiwara *et al* (24). This finding  
425 suggests that delamanid may be less likely to select such mutants in these genes and may  
426 retain more activity than pretomanid against these mutants due to the smaller selection window  
427 between the mutant and wild-type MICs. The reason for the differential impact of these  
428 mutations on pretomanid and delamanid susceptibility remains unexplained. However, it is  
429 conceivable that *M. tuberculosis* can utilize even relatively modest levels of Fo, F<sub>420</sub>-0 or

430 dehydro-F<sub>420</sub>-0 produced in the absence of FbiD or FbiB to activate delamanid. Apparently, this  
431 is not the case for pretomanid, which may be due in part to differences in the chemical structure  
432 of the two drugs and the impact on the efficiency of Ddn-mediated activation. This warrants  
433 further investigation.

434

435 Our WGS results confirm and significantly extend prior *in vitro* work demonstrating the  
436 remarkable diversity of mutations capable of conferring high-level nitroimidazole resistance.  
437 Among the 99 unique mutations we identified in 47 mice, only 3 mutations (K9N in *fgd*, R322L in  
438 *fbiC* and Q120P in *fbiA*) were found in more than one mouse and each mouse generally hosts 1  
439 to 4 unique mutations. Furthermore, by comparing the 99 unique mutations observed in our  
440 mice with the 151 unique mutations selected *in vitro* (23), the same mutation occurred only  
441 twice. Thus, each of the 6 genes now implicated in nitroimidazole resistance appears to be  
442 devoid of “hot spots” for such mutations. The unprecedented number and diversity of  
443 resistance-conferring mutations demonstrated for nitroimidazole drugs here and by Haver *et al*  
444 (23), clearly challenges the development and interpretation of rapid molecular susceptibility  
445 tests, especially considering that polymorphisms in nitroimidazole resistance genes that  
446 represent phylogenetic markers but do not confer pretomanid resistance are well-described (43,  
447 44). A similar situation exists for *pncA* mutations and pyrazinamide (PZA) resistance, where an  
448 efficient, yet comprehensive method based on saturating mutagenesis for distinguishing single  
449 nucleotide polymorphisms conferring resistance was recently described (45). A similar analysis  
450 of substitutions in the 6 genes related to nitroimidazole resistance would similarly advance  
451 the development of DST using genome sequencing technology.

452

453 Bashiri *et al* recently revised the F<sub>420</sub> biosynthetic pathway based on biochemical evidence that  
454 Rv2983 catalyzes production of the guanylated PEP moiety that is used with Fo by FbiA to  
455 produce dehydro-F<sub>420</sub>-0 (20). Using overexpression of *Rv2983* in *M. smegmatis* and *M.*

456 *tuberculosis* Rv2983 mutants, we show that expression of Rv2983 is necessary for efficient  
457 conversion of Fo to F<sub>420</sub>, and thereby providing the first evidence that Rv2983 is necessary for  
458 this step in the pathogen *M. tuberculosis* and adding to previous evidence that its ortholog  
459 MSMEG\_2392 is involved in F<sub>420</sub> biosynthesis in *M. smegmatis* (21). The validity of the method  
460 used in this study for detection of F<sub>420</sub> and Fo was demonstrated by showing the expected  
461 results with two pretomanid-resistant strains, KA016 and KA026, harboring mutations in *fbjC*  
462 and *ddn*, respectively.

463

464 Our findings regarding the heightened susceptibility of F<sub>420</sub>H<sub>2</sub>-deficient mutants to MG pose a  
465 previously unappreciated challenge to the development and use of phenotypic testing methods.  
466 Indeed, we observed reduced or delayed recovery of a nitroimidazole-resistant Rv2983 mutant  
467 on commercial 7H10 and LJ media that include MG as a selective decontaminant (46). Since  
468 *fbjA-C* and *fgd* mutants exhibited similar hypersusceptibility to MG in 7H9 agar supplemented  
469 with MG, their recovery on 7H10 and LJ is also likely to be affected. Although liquid culture  
470 media such as MGIT media are increasingly used in clinical microbiology laboratories, the  
471 selective growth inhibition of nitroimidazole-resistant strains on solid media that are still  
472 commonly used in clinical microbiology laboratories around the world for isolation and  
473 subculture of *M. tuberculosis* raises serious concern that their recovery from clinical specimens  
474 such as sputum, could be impaired, especially for isolates comprised of mixed wild-type and  
475 resistant populations. This concern is further amplified by the common practice of performing  
476 susceptibility testing (including molecular testing), not on primary samples but, on isolates that  
477 have been sub-cultured one or more times on solid media. Such practices may drastically  
478 reduce the proportion of (or eradicate) F<sub>420</sub>H<sub>2</sub>-deficient mutants present in the original sample. In  
479 addition, efforts to develop MG decolorization assays for detection of drug-resistant TB are  
480 expected to be fruitless for these mutants (47-50). We did not determine the basis for the  
481 greater recovery of F<sub>420</sub>H<sub>2</sub>-deficient mutants on 7H11 vs. 7H10 media despite 4x higher total

482 MG concentrations in the former. The principal differences between these media are the  
483 presence of pancreatic digest of casein in 7H11 and lower concentrations of magnesium sulfate  
484 countered by the addition of copper sulfate, zinc sulfate and calcium chloride in 7H10. Although  
485 this issue clearly requires further study, we presently believe that 7H10 and LJ should not be  
486 employed for phenotypic nitroimidazole susceptibility testing and that primary isolation or  
487 subculture of any isolate on such media prior to either phenotypic or genotypic susceptibility  
488 testing should be avoided whenever possible. When it cannot be avoided, larger inoculum sizes  
489 and longer incubation times may increase recovery on 7H10 and LJ. Based on our study, 7H11  
490 agar appears to be the preferred solid medium for recovery of  $F_{420}H_2$ -deficient nitroimidazole-  
491 resistant *M. tuberculosis*.

492  
493 In conclusion, using BALB/c and C3HeB/FeJ mice and WGS, we characterized the pretomanid  
494 dose-response relationships for bactericidal effect and suppression of drug-resistant mutants  
495 and profiled the genetic spectrum of pretomanid resistance emerging *in vivo*. A novel resistance  
496 determinant, Rv2983, was identified as essential for  $F_{420}$  biosynthesis and activation of the novel  
497 pro-drugs delamanid and pretomanid. Furthermore, we provide evidence that  $F_{420}H_2$ -deficient,  
498 nitroimidazole-resistant *M. tuberculosis* mutants are hypersensitive to MG, raising concern that  
499 using MG-containing medium could compromise the isolation and propagation of *M.*  
500 *tuberculosis* from clinical samples and therefore hinder the clinical diagnosis of nitroimidazole  
501 resistance. These findings have important implications for both genotypic and phenotypic  
502 susceptibility testing and treatment strategy to detect and eliminate nitroimidazole resistance,  
503 which will be of increasing importance as wider use of delamanid and pretomanid ensues. More  
504 comprehensive understanding of the spectrum of resistance mutations that emerge during  
505 treatment with new drugs *in vivo* should be considered as an integral part of TB drug  
506 development prior to clinical application.

507

## 508 MATERIALS AND METHODS

509 **Bacterial strains, media, antimicrobials and reagents.** Wild type *M. tuberculosis* H37Rv  
510 (ATCC 27294) was mouse-passaged, frozen in aliquots and used in all the experiments. The  
511 wild type *M. smegmatis* strain mc<sup>2</sup> 155 was obtained from the stock in the lab. Unless stated  
512 otherwise, Middlebrook 7H9 medium (Difco, BD) supplemented with 10% oleic acid-albumin-  
513 dextrose-catalase (OADC) complex (BD), 0.5% glycerol and 0.05% Tween 80 (Sigma-Aldrich)  
514 (7H9 broth) was used for cultivation. Dubos Tween Albumin Broth (BD Difco) supplemented with  
515 the hypoxia indicator methylene blue (Sigma-Aldrich, 500 mg/L) was prepared for the  
516 progressive hypoxia study. Middlebrook 7H10 agar and selective 7H11 agar (Difco, BD),  
517 prepared from powder and containing 10% OADC and 0.5% glycerol, were used for comparison  
518 of strain recovery on commercially available agar plates. Lowenstein Jensen (LJ) slants were  
519 purchased from BD. Pretomanid, delamanid and bedaquiline were kindly provided by the Global  
520 Alliance for TB Drug Development (New York, NY). Isoniazid, linezolid, clofazimine and  
521 menadione were purchased from Sigma-Aldrich.

522

523 **Mouse infection models and pretomanid treatment.** All animal procedures were approved by  
524 the Animal Care and Use Committee of Johns Hopkins University. Aerosol infections were  
525 performed using the Inhalation Exposure System (Glas-col Inc., Terre Haute, IN), as previously  
526 described (51). Briefly, 6-week-old female BALB/c mice (Charles River, Wilmington, MA) and  
527 C3HeB/FeJ mice (Jackson Laboratories Bar Harbor, ME) were infected with a log phase culture  
528 of *M. tuberculosis* that was grown in 7H9 broth to O.D.<sub>600nm</sub> = 1.0 and then diluted in the same  
529 medium prior to infection to deliver 50-100 CFU to the lungs. Pretomanid was formulated for  
530 oral administration as previously described (37). Beginning 8 weeks after aerosol infection, mice  
531 were randomly allocated into groups and treated once daily (5 days per week) for up to 8 weeks  
532 with pretomanid at doses of 10, 30, 100, 300 and 1000 mg/kg. Untreated mice were sacrificed  
533 on the day after aerosol infection and on the day of treatment initiation to determine the number

534 of CFU implanted in the lungs and pretreatment CFU counts, respectively. Additional mice were  
535 sacrificed after 3 and 8 weeks of treatment to evaluate the treatment response. Serial 10-fold  
536 dilutions of lung homogenates were plated on 7H11 agar. Week 8 samples including those from  
537 untreated mice were also plated in parallel on 7H11 plates containing 0.25, 1 and 10 µg/ml of  
538 pretomanid to quantify the resistant CFU. Plates were incubated at 37°C for 28 days before final  
539 CFU counts were determined.

540

541 **Whole genome sequencing.** For each mouse lung that yielded growth on pretomanid-  
542 containing plates, individual colonies and, for a subset of mice, pools of up to 15 colonies, were  
543 randomly selected from pretomanid-containing plates and sub-cultured in 7H9 broth prior to  
544 extraction of genomic DNA using the cetyltrimethylammonium bromide (CTAB) protocol (52)  
545 and vortexing (Genegate, Inc.). 2-3 µg of genomic DNA was sheared by a nebulizer to generate  
546 DNA fragments. The DNA library was prepared using a genomic DNA sample preparation kit  
547 (Illumina, Inc.), in which adapter-ligated DNA fragments were 250-350 bp in length, and carried  
548 out on an Illumina HiSeq 2500 (Illumina, Inc). The sequencer was operated in paired-end mode  
549 to collect pairs of reads of 72-bp from opposite ends of each fragment. Image analysis and  
550 base-calling were done by using the Illumina GA Pipeline software (v0.3). The reads that were  
551 generated for each strain were aligned to the reference genome of *M. tuberculosis* H37Rv (53).  
552 Based on alignment to the corresponding region in the reference genome, single nucleotide  
553 polymorphism (SNP), insertion and deletion were identified on the genome of resistant strains  
554 by using a contig-building algorithm to construct a local ~200 bp sequence spanning the site of  
555 mutagenesis (54). Distribution of mutation type and mutation frequency in genes involved in  
556 nitroimidazole resistance was calculated by counting the total number of unique mutations  
557 isolated from each mouse in the same treatment group.

558

559 **Complementation of an *Rv2983* mutation.** A 1,044-bp DNA fragment containing the open  
560 reading frame (ORF) of the wild type *Rv2983* gene, including 340 bp of 5'-flanking sequence  
561 and 59 bp of 3'-flanking sequence, was PCR-amplified from *M. tuberculosis* H37Rv genomic  
562 DNA using primers *Rv2983*-1F and *Rv2983*-1R (Table S1). The *Rv2983* PCR product was  
563 ligated into XbaI-digested *E. coli*-mycobacterium shuttle vector pMH94 (28) using NE builder  
564 HiFi DNA assembly kit (NE Biolabs) to generate the recombinant pMH94-*Rv2983* vector.  
565 Similarly, a 388-bp DNA fragment containing the *hsp60* promoter and a 645-bp DNA fragment  
566 of *Rv2983* open reading frame were amplified from *M. tuberculosis* H37Rv genomic DNA using  
567 primer sets *hsp60*-F and *hsp60*-R and *Rv2983*-2F and *Rv2983*-2R, respectively (Table S1), and  
568 ligated into XbaI-digested *E. coli*-mycobacterium shuttle vector pMH94 to yield pMH94-*hsp60*-  
569 *Rv2983*. A small amount of ligation reaction was transferred into *E. coli* competent cells,  
570 followed by DNA sequencing of the inserts in the corresponding recombinants. The  
571 recombinants pMH94-*Rv2983* and pMH94-*hsp60*-*Rv2983* were electroporated into competent  
572 cells of *Rv2983* mutant strain BA\_101 (B101), harboring an A198P substitution, to enable  
573 selection of complemented candidates B101p*Rv2983* and B101p*hsp60*-*Rv2983* on 7H10 agar  
574 containing 25 µg/ml of kanamycin. To confirm the complementation genetically, Southern  
575 blotting was performed using a digoxigenin (DIG) DNA labeling and detection kit according to  
576 the manufacturer's protocol (Sigma). Briefly, a 448-bp *Rv2983* probe was generated by addition  
577 of DIG-dUTP (Sigma) to PCR reactions containing primer pairs *Rv2983*-3F and *Rv2983*-3R  
578 (Table S1). Acc65I-digested (NE Biolabs) genomic DNA of the wild type, the B101 mutant and  
579 the B101p*Rv2983* and B101p*hsp60*-*Rv2983* complemented strains was separated on agarose  
580 gel and transferred onto positively-charged nylon-membrane (GE). After pre-hybridization, the  
581 membrane was hybridized with the DIG-labeled *Rv2983* probe at 68°C overnight, followed by  
582 addition of anti-DIG alkaline phosphatase conjugate. After stringent washes, the membrane was  
583 incubated with the chemiluminescence substrate disodium 3-(4-methoxyspiro {1,2-dioxetane-

584 3,2(5'-chloro)tricycloecan}-4-yl)phenyl phosphate (CSPD) and exposed on X-ray film in a dark  
585 room prior to development using a developer (AFP imaging)(27).

586

587 **MIC determination.** MICs were determined using a broth macrodilution assay. Log-phase  
588 cultures were adjusted to achieve a bacterial density of approximately  $10^5$  CFU/ml when added  
589 to conical tubes containing complete 7H9 broth without Tween 80 and with or without either  
590 pretomanid or delamanid in concentrations ranging from 0.015 to 32  $\mu$ g/ml or from 0.001 to 16  
591  $\mu$ g/ml, respectively. Drugs were initially dissolved in dimethylsulfoxide (DMSO) (Sigma) prior to  
592 further dilution in 7H9 broth. Cultures were incubated at 37°C for 14 days. MIC was defined as  
593 the lowest drug concentration that inhibited visible *M. tuberculosis* growth (55, 56). The  
594 experiments were performed at least twice for each strain.

595

596 **Time-kill assays.** Mid-log-phase cultures of *M. tuberculosis* were diluted to OD<sub>600nm</sub> of 0.001  
597 (about  $10^5$  CFU/ml) in 3 ml of 7H9 broth, exposed to isoniazid, linezolid, bedaquiline or  
598 clofazimine, and then incubated in a 37°C shaker for 7 or 14 days. Aliquots were plated on  
599 7H11 agar after serial dilutions and incubated for 21 days at 37°C prior to CFU counting. The  
600 experiments were performed twice.

601

602 **Oxidative stress and progressive hypoxia assays.** To observe the response to menadione-  
603 induced oxidative stress, mid-log phase cultures of *M. tuberculosis* were diluted to OD<sub>600nm</sub>  
604 of 0.01 (about  $10^6$  CFU/ml) in 3 ml of 7H9 broth containing varying concentrations of menadione  
605 or no menadione. The cultures were incubated in a 37°C shaker for 6 days. To study survival  
606 under progressive hypoxia, the mid-log phase cultures were diluted to OD<sub>600nm</sub> of 0.001 (about  
607  $10^5$  CFU/ml) in 20 ml of Dubos Tween Albumin Broth with methylene blue (500 mg/L) in rubber-  
608 cap test tubes (25mmX125mm) with sterile magnetic stir bars. The tubes were sealed and  
609 incubated upright on a magnetic platform at 37°C until the methylene blue dye changed to



610 yellow, indicating the depletion of oxygen, and then incubated for an additional 21 days after the  
611 color change (57). Samples from various time points were collected from the above cultures and  
612 plated on 7H11 agar plates after serial dilutions followed by 21 days of incubation at 37°C  
613 before CFU counting. In the progressive hypoxia assay, samples were taken by carefully  
614 inserting a syringe needle through the rubber stopper to avoid introducing oxygen to the cultures.  
615

616 **Virulence assessment in BALB/c mice.** Female BALB/c mice (6-8 weeks of age) (Charles  
617 River Labs) were aerosol-infected with approximately 100 CFU of *M. tuberculosis* using the  
618 Inhalation Exposure System (Glas-Col). After infection, groups of 4–5 mice were sacrificed on  
619 day 1 and at designated time points thereafter. Lungs and spleens were removed aseptically.  
620 The weights of body, lung and spleen were measured and recorded. The upper lobe of the left  
621 lung was removed, fixed in paraformaldehyde and processed for histological examination by  
622 hematoxylin and eosin staining. After serial dilution the homogenates of the remaining lung  
623 tissues were plated on Middlebrook 7H11 selective agar plates (Thermo Fisher Scientific) and  
624 incubated at 37°C for 28 days prior to CFU counting.

625  
626 **Construction of recombinants overexpressing Rv2983, with or without *fbiC*, in *M.***  
627 ***smegmatis*.** A 645-bp DNA fragment containing the *Rv2983* ORF was PCR-amplified from *M.*  
628 *tuberculosis* H37Rv genomic DNA using primers *Rv2983-4F* and *Rv2983-4R* (Table S1). The  
629 amplified PCR product was ligated into the *Nde*I- and *Pac*I-digested *E. coli*-mycobacterium  
630 shuttle vector pYUBDuet (58) using NE builder HiFi DNA assembly kit (NE Biolabs) and then  
631 transferred into Turbo-competent *E. coli* cells (NE Biolabs) prior to plating on LB agar plates  
632 containing 100 µg/ml of hygromycin B for selection of recombinants. The *Rv2983* PCR product  
633 was also similarly ligated into the same *Nde*I- and *Pac*I-digested pYUBDuet vector harboring  
634 *fbiC* (termed *pfbiC*) (58) to overexpress both *Rv2983* and *fbiC*. After confirmation by restriction  
635 digestion and DNA sequencing, the constructs were electroporated into competent *M.*

636 *smegmatis* cells prior to selecting recombinants on 7H10 agar plates containing 100 µg/ml of  
637 hygromycin B. PCR amplification of the hygromycin resistance gene with primers hyg-F and  
638 hyg-R (Table S1) was used to confirm the inserts on the *M. smegmatis* genome. pYUBDuet and  
639 pYUBDuet harboring *fbiA*, *fbiB* and *fbiC* (termed *pfbiABC*) (58) were also transferred into  
640 competent *M. smegmatis* cells to serve as controls.

641

642 **Measurement of Fo and F<sub>420</sub>**. Extraction of Fo and F<sub>420</sub> was performed in *M. smegmatis* and *M.*  
643 *tuberculosis* strains according to a previous study (58), with minor modifications. Briefly, *M.*  
644 *smegmatis* strains harboring different constructs and pYUBDuet were grown in 7H9 broth in a  
645 shaker to mid-log phase (O.D.<sub>600nm</sub> = 0.7-1.0), followed by induction using 1mM isopropyl β-D-1-  
646 thiogalactopyranoside (IPTG) for 6 and 26 hours. After centrifugation for 15 min at 16000 x g,  
647 the supernatants were removed for detection of Fo, which is principally found in culture  
648 supernatant whereas F<sub>420</sub> with 5 or 6 glutamate residues is largely retained inside cells (16, 58,  
649 59). The cell pellets were washed with 25mM sodium phosphate buffer (pH 7.0) and re-  
650 suspended at 100 mg/mL in the same buffer, then autoclaved at 121°C for 15 min. After  
651 centrifugation at 16000 x g for 15 min at 4°C, the cell extracts were harvested for detection of  
652 F<sub>420</sub> (58). Fluorescence of the supernatant and cell extracts was measured using an excitation  
653 wavelength of 410 nm and an emission wavelength of 465 nm. Fluorescent signals of Fo were  
654 normalized using the O.D. at 600nm. The small portion of Fo (1-7%) retained inside cells was  
655 ignored when quantifying F<sub>420</sub> in cell extracts (60). Relative fluorescent signals were calculated  
656 in *M. smegmatis* harboring each of recombinants relative to pYUBDuet alone. Similarly, cell  
657 extracts and supernatant were also extracted from *M. tuberculosis* strains grown in 7H9 broth  
658 for 6 days at initial O.D.<sub>600nm</sub> of 0.1. Relative fluorescent signals of F<sub>420</sub> and Fo were calculated  
659 using cell extracts and supernatant relative to 25 mM phosphate buffer and 7H9 broth,  
660 respectively. *M. smegmatis* harboring pYUBDuet-*fbiABC* was used as a positive signal control  
661 for Fo and F<sub>420</sub> due to their commercial unavailability (58). The experiment was repeated twice.

662

663 **Malachite green susceptibility testing.** 7H9 media supplemented with 10% OADC, 0.5%  
664 glycerol, 1.5% Bacto™ Agar (BD) and malachite green (MG) oxalate (Alfa Aesar) was used to  
665 prepare solid 7H9 media with differing MG concentrations. *M. tuberculosis* strains were grown to  
666 mid-log phase and diluted to  $OD_{600nm} = 0.1$  in 7H9 broth before serial 10-fold dilutions were  
667 plated in 100 or 500  $\mu$ l aliquots on 7H9 agar containing MG concentrations of 0, 0.1, 0.3, 1, 3,  
668 10, 30, 100, 300, 1000  $\mu$ g/ml or 0, 3, 6, 12  $\mu$ g/ml. CFU were counted after 28, 35 and 49 days of  
669 incubation. The same cultures were also plated on 7H10 and 7H11 agar plates and LJ slants.  
670 Serially diluted cultures were inoculated onto LJ slants using calibrated disposable inoculating  
671 loops (10  $\mu$ l per loop, BD) as one loop per LJ slant. Plates were incubated at 37°C for 21, 28  
672 and 35 days for CFU counts. Colony size was observed weekly until day 35, beginning 21 days  
673 after plating. The experiment was repeated two times under similar conditions.

674

675 **Statistical analysis.** Log<sub>10</sub>-transformed CFU counts, fold-change values of gene expression  
676 and absorbance ( $A_{410}$ ) values of fluorescent signals were used to calculate means and standard  
677 deviations for each data set. Differences between means were compared by the Student's *t* test  
678 in Microsoft Excel. Differences in mutation frequencies between two mouse models were  
679 evaluated by Fisher's exact test in GraphPad Prism 6. A *p*-value of < 0.05 was considered  
680 statistically significant.

681

682 **Acknowledgements:** The Global Alliance for TB Drug Development kindly provided pretomanid  
683 and delamanid under a material transfer agreement. The authors gratefully acknowledge Anna  
684 Upton and Juliano Timm for critical reading of the manuscript. **Funding:** The authors gratefully  
685 acknowledge support in the form of funding from the Bill and Melinda Gates Foundation  
686 (OPP1037174) (E.L.N.) and the National Institutes of Health (R01-AI111992) (ELN). G.B. is  
687 supported by a Sir Charles Hercus Fellowship through the Health Research Council of New

688 Zealand. **Author contributions:** D.R. and E.L.N. conceived the study and designed the  
689 experiments. S.L. and J-P.L. assisted with the design and conduct of the *in vivo* experiment.  
690 Whole genome sequencing was performed and analyzed by T.I. and J.S., and the results were  
691 further analyzed by D.R. and E.L.N. *In vitro* experiments were performed and analyzed by D.R.,  
692 K.S., J.L. and E.L.N. The manuscript was drafted by D.R. and E.L.N. with critical input from T.I.,  
693 J.S., and G.B. **Competing interests:** E.N. reports research support in the form of a contract  
694 from the Global Alliance for TB Drug Development. E.L.N. and J.S. report research  
695 collaborations with the Global Alliance for TB Drug Development on U19-AI-142735. All other  
696 authors declare that they have no competing interests. **Data and materials availability:** All  
697 data necessary for evaluation of the conclusions are present in the paper and/or the  
698 Supplementary Materials.  
699

## 700 REFERENCES

- 701 1. WHO. 2017. Global Tuberculosis report. World Health Organization Geneva.
- 702 2. WHO. 2011. Guidelines for the programmatic management of drug-resistant  
703 tuberculosis. . World Health Organization Geneva.
- 704 3. Li SY, Tasneen R, Tyagi S, Soni H, Converse PJ, Mdluli K, Nuermberger EL. 2017.  
705 Bactericidal and Sterilizing Activity of a Novel Regimen with Bedaquiline, Pretomanid,  
706 Moxifloxacin, and Pyrazinamide in a Murine Model of Tuberculosis. *Antimicrob Agents*  
707 *Chemother* 61.
- 708 4. Tasneen R, Betoudji F, Tyagi S, Li SY, Williams K, Converse PJ, Dartois V, Yang T,  
709 Mendel CM, Mdluli KE, Nuermberger EL. 2015. Contribution of Oxazolidinones to the  
710 Efficacy of Novel Regimens Containing Bedaquiline and Pretomanid in a Mouse Model  
711 of Tuberculosis. *Antimicrob Agents Chemother* 60:270-7.
- 712 5. Skripconoka V, Danilovits M, Pehme L, Tomson T, Skenders G, Kummik T, Cirule A,  
713 Leimane V, Kurve A, Levina K, Geiter LJ, Manissero D, Wells CD. 2013. Delamanid  
714 improves outcomes and reduces mortality in multidrug-resistant tuberculosis. *Eur Respir*  
715 *J* 41:1393-400.
- 716 6. Gler MT, Skripconoka V, Sanchez-Garavito E, Xiao H, Cabrera-Rivero JL, Vargas-  
717 Vasquez DE, Gao M, Awad M, Park SK, Shim TS, Suh GY, Danilovits M, Ogata H,  
718 Kurve A, Chang J, Suzuki K, Tupasi T, Koh WJ, Seaworth B, Geiter LJ, Wells CD. 2012.  
719 Delamanid for multidrug-resistant pulmonary tuberculosis. *N Engl J Med* 366:2151-60.
- 720 7. Dawson R, Diacon AH, Everitt D, van Niekerk C, Donald PR, Burger DA, Schall R,  
721 Spigelman M, Conradie A, Eisenach K, Venter A, Ive P, Page-Shipp L, Variava E,  
722 Reither K, Ntinginya NE, Pym A, von Groote-Bidlingmaier F, Mendel CM. 2015.  
723 Efficiency and safety of the combination of moxifloxacin, pretomanid (PA-824), and  
724 pyrazinamide during the first 8 weeks of antituberculosis treatment: a phase 2b, open-

- 725 label, partly randomised trial in patients with drug-susceptible or drug-resistant  
726 pulmonary tuberculosis. *Lancet* 385:1738-47.
- 727 8. Matsumoto M, Hashizume H, Tomishige T, Kawasaki M, Tsubouchi H, Sasaki H,  
728 Shimokawa Y, Komatsu M. 2006. OPC-67683, a nitro-dihydro-imidazooxazole derivative  
729 with promising action against tuberculosis in vitro and in mice. *PLoS Med* 3:e466.
- 730 9. Conradie F, Diacon AH, Ngubane N, Howell P, Everitt D, Crook AM, Mendel CM, Egizi E,  
731 Moreira J, Timm J, McHugh TD, Wills GH, Bateson A, Hunt R, Van Niekerk C, Li M,  
732 Olugbosi M, Spigelman M. 2020. Treatment of Highly Drug-Resistant Pulmonary  
733 Tuberculosis. *N Engl J Med* 382:893-902.
- 734 10. von Groote-Bidlingmaier F, Patientia R, Sanchez E, Balanag V, Jr., Ticona E, Segura P,  
735 Cadena E, Yu C, Cirule A, Lizarbe V, Davidaviciene E, Damente L, Variava E, Caoili J,  
736 Danilovits M, Bielskiene V, Staples S, Hittel N, Petersen C, Wells C, Hafkin J, Geiter LJ,  
737 Gupta R. 2019. Efficacy and safety of delamanid in combination with an optimised  
738 background regimen for treatment of multidrug-resistant tuberculosis: a multicentre,  
739 randomised, double-blind, placebo-controlled, parallel group phase 3 trial. *Lancet Respir*  
740 *Med* 7:249-259.
- 741 11. EMA. 2013. Delyba delamanid Summary of the European public assessment report  
742 (EPAR) for Delyba European Medicines Agency [www.ema.europa.eu/Find](http://www.ema.europa.eu/Find)  
743 [medicine/Human medicines/European public assessment reports](http://www.ema.europa.eu/Find)
- 744
- 745 12. Cellitti SE, Shaffer J, Jones DH, Mukherjee T, Gurumurthy M, Bursulaya B, Boshoff HI,  
746 Choi I, Nayyar A, Lee YS, Cherian J, Niyomrattanakit P, Dick T, Manjunatha UH, Barry  
747 CE, 3rd, Spraggon G, Geierstanger BH. 2012. Structure of Ddn, the deazaflavin-  
748 dependent nitroreductase from *Mycobacterium tuberculosis* involved in bioreductive  
749 activation of PA-824. *Structure* 20:101-12.

- 750 13. Bashiri G, Squire CJ, Moreland NJ, Baker EN. 2008. Crystal structures of F420-  
751 dependent glucose-6-phosphate dehydrogenase FGD1 involved in the activation of the  
752 anti-tuberculosis drug candidate PA-824 reveal the basis of coenzyme and substrate  
753 binding. *J Biol Chem* 283:17531-41.
- 754 14. Greening C, Ahmed FH, Mohamed AE, Lee BM, Pandey G, Warden AC, Scott C,  
755 Oakeshott JG, Taylor MC, Jackson CJ. 2016. Physiology, Biochemistry, and  
756 Applications of F420- and Fo-Dependent Redox Reactions. *Microbiol Mol Biol Rev*  
757 80:451-93.
- 758 15. Purwantini E, Gillis TP, Daniels L. 1997. Presence of F420-dependent glucose-6-  
759 phosphate dehydrogenase in *Mycobacterium* and *Nocardia* species, but absence from  
760 *Streptomyces* and *Corynebacterium* species and methanogenic Archaea. *FEMS*  
761 *Microbiol Lett* 146:129-34.
- 762 16. Graham DE, Xu H, White RH. 2003. Identification of the 7,8-didemethyl-8-hydroxy-5-  
763 deazariboflavin synthase required for coenzyme F(420) biosynthesis. *Arch Microbiol*  
764 180:455-64.
- 765 17. Choi KP, Bair TB, Bae YM, Daniels L. 2001. Use of transposon Tn5367 mutagenesis  
766 and a nitroimidazopyran-based selection system to demonstrate a requirement for *fbiA*  
767 and *fbiB* in coenzyme F(420) biosynthesis by *Mycobacterium bovis* BCG. *J Bacteriol*  
768 183:7058-66.
- 769 18. Decamps L, Philmus B, Benjdia A, White R, Begley TP, Berteau O. 2012. Biosynthesis  
770 of F0, precursor of the F420 cofactor, requires a unique two radical-SAM domain  
771 enzyme and tyrosine as substrate. *J Am Chem Soc* 134:18173-6.
- 772 19. Choi KP, Kendrick N, Daniels L. 2002. Demonstration that *fbiC* is required by  
773 *Mycobacterium bovis* BCG for coenzyme F(420) and FO biosynthesis. *J Bacteriol*  
774 184:2420-8.

- 775 20. Bashiri G, Antoney J, Jirgis ENM, Shah MV, Ney B, Copp J, Stuteley SM, Sreebhavan S,  
776 Palmer B, Middleditch M, Tokuriki N, Greening C, Scott C, Baker EN, Jackson CJ. 2019.  
777 A revised biosynthetic pathway for the cofactor F420 in prokaryotes. *Nat Commun*  
778 10:1558.
- 779 21. Guerra-Lopez D, Daniels L, Rawat M. 2007. *Mycobacterium smegmatis* mc2 155 fbiC  
780 and MSMEG\_2392 are involved in triphenylmethane dye decolorization and coenzyme  
781 F420 biosynthesis. *Microbiology* 153:2724-32.
- 782 22. Stover CK, Warrener P, VanDevanter DR, Sherman DR, Arain TM, Langhorne MH,  
783 Anderson SW, Towell JA, Yuan Y, McMurray DN, Kreiswirth BN, Barry CE, Baker WR.  
784 2000. A small-molecule nitroimidazopyran drug candidate for the treatment of  
785 tuberculosis. *Nature* 405:962-6.
- 786 23. Haver HL, Chua A, Ghode P, Lakshminarayana SB, Singhal A, Mathema B, Wintjens R,  
787 Bifani P. 2015. Mutations in genes for the F420 biosynthetic pathway and a  
788 nitroreductase enzyme are the primary resistance determinants in spontaneous in vitro-  
789 selected PA-824-resistant mutants of *Mycobacterium tuberculosis*. *Antimicrob Agents*  
790 *Chemother* 59:5316-23.
- 791 24. Fujiwara M, Kawasaki M, Hariguchi N, Liu Y, Matsumoto M. 2018. Mechanisms of  
792 resistance to delamanid, a drug for *Mycobacterium tuberculosis*. *Tuberculosis (Edinb)*  
793 108:186-194.
- 794 25. Subbian S, Tsenova L, Kim MJ, Wainwright HC, Visser A, Bandyopadhyay N, Bader JS,  
795 Karakousis PC, Murrmann GB, Bekker LG, Russell DG, Kaplan G. 2015. Lesion-Specific  
796 Immune Response in Granulomas of Patients with Pulmonary Tuberculosis: A Pilot  
797 Study. *PLoS One* 10:e0132249.
- 798 26. Rifat D, Prideaux B, Savic RM, Urbanowski ME, Parsons TL, Luna B, Marzinke MA,  
799 Ordonez AA, DeMarco VP, Jain SK, Dartois V, Bishai WR, Dooley KE. 2018.



- 800 Pharmacokinetics of rifapentine and rifampin in a rabbit model of tuberculosis and  
801 correlation with clinical trial data. *Sci Transl Med* 10.
- 802 27. Rifat D, Belchis DA, Karakousis PC. 2014. senX3-independent contribution of regX3 to  
803 *Mycobacterium tuberculosis* virulence. *BMC Microbiol* 14:265.
- 804 28. Lee MH, Pascopella L, Jacobs WR, Jr., Hatfull GF. 1991. Site-specific integration of  
805 mycobacteriophage L5: integration-proficient vectors for *Mycobacterium smegmatis*,  
806 *Mycobacterium tuberculosis*, and bacille Calmette-Guerin. *Proc Natl Acad Sci U S A*  
807 88:3111-5.
- 808 29. WHO. 2018. Technical report on critical concentrations for TB drug susceptibility testing  
809 of medicines used in the treatment of drug-resistant TB.  
810 [http://www.who.int/tb/publications/2018/WHO\\_technical\\_report\\_concentrations\\_TB\\_drug\\_](http://www.who.int/tb/publications/2018/WHO_technical_report_concentrations_TB_drug_susceptibility)  
811 [susceptibility](http://www.who.int/tb/publications/2018/WHO_technical_report_concentrations_TB_drug_susceptibility).
- 812 30. Gurumurthy M, Rao M, Mukherjee T, Rao SP, Boshoff HI, Dick T, Barry CE, 3rd,  
813 Manjunatha UH. 2013. A novel F(420) -dependent anti-oxidant mechanism protects  
814 *Mycobacterium tuberculosis* against oxidative stress and bactericidal agents. *Mol*  
815 *Microbiol* 87:744-55.
- 816 31. Kohanski MA, Dwyer DJ, Hayete B, Lawrence CA, Collins JJ. 2007. A common  
817 mechanism of cellular death induced by bactericidal antibiotics. *Cell* 130:797-810.
- 818 32. Via LE, Lin PL, Ray SM, Carrillo J, Allen SS, Eum SY, Taylor K, Klein E, Manjunatha U,  
819 Gonzales J, Lee EG, Park SK, Raleigh JA, Cho SN, McMurray DN, Flynn JL, Barry CE,  
820 3rd. 2008. Tuberculous granulomas are hypoxic in guinea pigs, rabbits, and nonhuman  
821 primates. *Infect Immun* 76:2333-40.
- 822 33. Jirapanjawat T, Ney B, Taylor MC, Warden AC, Afroze S, Russell RJ, Lee BM, Jackson  
823 CJ, Oakeshott JG, Pandey G, Greening C. 2016. The Redox Cofactor F420 Protects  
824 *Mycobacteria* from Diverse Antimicrobial Compounds and Mediates a Reductive  
825 Detoxification System. *Appl Environ Microbiol* 82:6810-6818.

- 826 34. Diacon AH, Dawson R, von Groote-Bidlingmaier F, Symons G, Venter A, Donald PR,  
827 van Niekerk C, Everitt D, Winter H, Becker P, Mendel CM, Spigelman MK. 2012. 14-day  
828 bactericidal activity of PA-824, bedaquiline, pyrazinamide, and moxifloxacin  
829 combinations: a randomised trial. *Lancet* 380:986-93.
- 830 35. Kadura S, King N, Nakhoul M, Zhu H, Theron G, Koser CU, Farhat M. 2020. Systematic  
831 review of mutations associated with resistance to the new and repurposed  
832 Mycobacterium tuberculosis drugs bedaquiline, clofazimine, linezolid, delamanid and  
833 pretomanid. *J Antimicrob Chemother* doi:10.1093/jac/dkaa136.
- 834 36. Hurdle JG, Lee RB, Budha NR, Carson EI, Qi J, Scherman MS, Cho SH, McNeil MR,  
835 Lenaerts AJ, Franzblau SG, Meibohm B, Lee RE. 2008. A microbiological assessment of  
836 novel nitrofuranylamides as anti-tuberculosis agents. *J Antimicrob Chemother* 62:1037-  
837 45.
- 838 37. Tyagi S, Nuermberger E, Yoshimatsu T, Williams K, Rosenthal I, Lounis N, Bishai W,  
839 Grosset J. 2005. Bactericidal activity of the nitroimidazopyran PA-824 in a murine model  
840 of tuberculosis. *Antimicrob Agents Chemother* 49:2289-93.
- 841 38. Manjunatha UH, Boshoff H, Dowd CS, Zhang L, Albert TJ, Norton JE, Daniels L, Dick T,  
842 Pang SS, Barry CE, 3rd. 2006. Identification of a nitroimidazo-oxazine-specific protein  
843 involved in PA-824 resistance in Mycobacterium tuberculosis. *Proc Natl Acad Sci U S A*  
844 103:431-6.
- 845 39. Bloemberg GV, Keller PM, Stucki D, Trauner A, Borrell S, Latshang T, Coscolla M,  
846 Rothe T, Homke R, Ritter C, Feldmann J, Schulthess B, Gagneux S, Bottger EC.  
847 Acquired Resistance to Bedaquiline and Delamanid in Therapy for Tuberculosis. *N Engl*  
848 *J Med*. 2015 Nov 12;373(20):1986-8. doi: 10.1056/NEJMc1505196.
- 849 40. Stinson K, Kurepina N, Venter A, Fujiwara M, Kawasaki M, Timm J, Shashkina E,  
850 Kreiswirth BN, Liu Y, Matsumoto M, Geiter L. 2016. MIC of Delamanid (OPC-67683)

- 851 against Mycobacterium tuberculosis Clinical Isolates and a Proposed Critical  
852 Concentration. Antimicrob Agents Chemother 60:3316-22.
- 853 41. Hoffmann H, Kohl TA, Hofmann-Thiel S, Merker M, Beckert P, Jatou K, Nedialkova L,  
854 Sahalchik E, Rothe T, Keller PM, Niemann S. 2016. Delamanid and Bedaquiline  
855 Resistance in Mycobacterium tuberculosis Ancestral Beijing Genotype Causing  
856 Extensively Drug-Resistant Tuberculosis in a Tibetan Refugee. Am J Respir Crit Care  
857 Med 193:337-40.
- 858 42. Harper J, Skerry C, Davis SL, Tasneen R, Weir M, Kramnik I, Bishai WR, Pomper MG,  
859 Nuernberger EL, Jain SK. 2012. Mouse model of necrotic tuberculosis granulomas  
860 develops hypoxic lesions. J Infect Dis 205:595-602.
- 861 43. Schena E, Nedialkova L, Borroni E, Battaglia S, Cabibbe AM, Niemann S, Utpatel C,  
862 Merker M, Trovato A, Hofmann-Thiel S, Hoffmann H, Cirillo DM. 2016. Delamanid  
863 susceptibility testing of Mycobacterium tuberculosis using the resazurin microtitre assay  
864 and the BACTEC MGIT 960 system. J Antimicrob Chemother 71:1532-9.
- 865 44. Feuerriegel S, Koser CU, Bau D, Rusch-Gerdes S, Summers DK, Archer JA, Marti-  
866 Renom MA, Niemann S. 2011. Impact of Fgd1 and ddn diversity in Mycobacterium  
867 tuberculosis complex on in vitro susceptibility to PA-824. Antimicrob Agents Chemother  
868 55:5718-22.
- 869 45. Yadon AN, Maharaj K, Adamson JH, Lai YP, Sacchettini JC, Ioerger TR, Rubin EJ, Pym  
870 AS. 2017. A comprehensive characterization of PncA polymorphisms that confer  
871 resistance to pyrazinamide. Nat Commun 8:588.
- 872 46. Cousins DV, Francis BR, Gow BL. 1989. Advantages of a new agar medium in the  
873 primary isolation of Mycobacterium bovis. Vet Microbiol 20:89-95.
- 874 47. Mirabal NC, Yzquierdo SL, Lemus D, Madruga M, Milian Y, Echemendia M, Takiff H,  
875 Martin A, Van der Stuyf P, Palomino JC, Montoro E. 2010. Evaluation of colorimetric

- 876 methods using nicotinamide for rapid detection of pyrazinamide resistance in  
877 *Mycobacterium tuberculosis*. *J Clin Microbiol* 48:2729-33.
- 878 48. Coban AY, Uzun M. 2013. Rapid detection of multidrug-resistant *Mycobacterium*  
879 *tuberculosis* using the malachite green decolourisation assay. *Mem Inst Oswaldo Cruz*  
880 108:1021-3.
- 881 49. Martin A, Portaels F, Palomino JC. 2007. Colorimetric redox-indicator methods for the  
882 rapid detection of multidrug resistance in *Mycobacterium tuberculosis*: a systematic  
883 review and meta-analysis. *J Antimicrob Chemother* 59:175-83.
- 884 50. Farnia P, Mohammadi F, Mirsaedi M, Zarife AZ, Tabatabaee J, Bahadori K, Bahadori M,  
885 Masjedi MR, Velayati AA. 2004. Application of oxidation-reduction assay for monitoring  
886 treatment of patients with pulmonary tuberculosis. *J Clin Microbiol* 42:3324-5.
- 887 51. Nuermberger EL, Yoshimatsu T, Tyagi S, Williams K, Rosenthal I, O'Brien RJ, Vernon  
888 AA, Chaisson RE, Bishai WR, Grosset JH. 2004. Moxifloxacin-containing regimens of  
889 reduced duration produce a stable cure in murine tuberculosis. *Am J Respir Crit Care*  
890 *Med* 170:1131-4.
- 891 52. Larsen MH, Biermann K, Tandberg S, Hsu T, Jacobs WR, Jr. 2007. Genetic  
892 Manipulation of *Mycobacterium tuberculosis*. *Curr Protoc Microbiol* Chapter 10:Unit 10A  
893 2.
- 894 53. Ioerger TR, Feng Y, Ganesula K, Chen X, Dobos KM, Fortune S, Jacobs WR, Jr.,  
895 Mizrahi V, Parish T, Rubin E, Sassetti C, Sacchettini JC. 2010. Variation among genome  
896 sequences of H37Rv strains of *Mycobacterium tuberculosis* from multiple laboratories. *J*  
897 *Bacteriol* 192:3645-53.
- 898 54. Ioerger TR, O'Malley T, Liao R, Guinn KM, Hickey MJ, Mohaideen N, Murphy KC,  
899 Boshoff HI, Mizrahi V, Rubin EJ, Sassetti CM, Barry CE, 3rd, Sherman DR, Parish T,  
900 Sacchettini JC. 2013. Identification of new drug targets and resistance mechanisms in  
901 *Mycobacterium tuberculosis*. *PLoS One* 8:e75245.

- 902 55. Almeida D, Ioerger T, Tyagi S, Li SY, Mdluli K, Andries K, Grosset J, Sacchettini J,  
903 Nuermberger E. 2016. Mutations in pepQ Confer Low-Level Resistance to Bedaquiline  
904 and Clofazimine in Mycobacterium tuberculosis. Antimicrob Agents Chemother 60:4590-  
905 9.
- 906 56. Ahmad Z, Peloquin CA, Singh RP, Derendorf H, Tyagi S, Ginsberg A, Grosset JH,  
907 Nuermberger EL. 2011. PA-824 exhibits time-dependent activity in a murine model of  
908 tuberculosis. Antimicrob Agents Chemother 55:239-45.
- 909 57. Wayne LG, Hayes LG. 1996. An in vitro model for sequential study of shutdown of  
910 Mycobacterium tuberculosis through two stages of nonreplicating persistence. Infect  
911 Immun 64:2062-9.
- 912 58. Bashiri G, Rehan AM, Greenwood DR, Dickson JM, Baker EN. 2010. Metabolic  
913 engineering of cofactor F420 production in Mycobacterium smegmatis. PLoS One  
914 5:0015803.
- 915 59. Isabelle D, Simpson DR, Daniels L. 2002. Large-Scale Production of Coenzyme F(420)-  
916 5,6 by Using Mycobacterium smegmatis. Appl Environ Microbiol 68:5750-5755.
- 917 60. Bair TB, Isabelle DW, Daniels L. 2001. Structures of coenzyme F(420) in Mycobacterium  
918 species. Arch Microbiol 176:37-43.
- 919  
920  
921

922 **Table 1. Pretomanid and delamanid MICs against the parent H37Rv strain and isogenic**  
 923 **mutants selected in mice**

| Name of isolate selected | Mutated gene  | Mutation                                 | Pretomanid MIC (µg/ml) | Delamanid MIC (µg/ml) |
|--------------------------|---------------|------------------------------------------|------------------------|-----------------------|
| H37Rv                    | n/a           | n/a                                      | 0.25                   | 0.008                 |
| BA019a                   | <i>Rv2983</i> | +C in aa 27                              | >32                    | >16                   |
| BA032                    | <i>Rv2983</i> | G147C                                    | >32                    | 0.06                  |
| BA043                    | <i>Rv2983</i> | A132V                                    | >32                    | 0.06                  |
| BA060                    | <i>Rv2983</i> | -ATC in aa 129                           | >32                    | 0.06                  |
| BA078-82                 | <i>Rv2983</i> | R25S                                     | >32                    | 0.03-0.06             |
| B101                     | <i>Rv2983</i> | A198P                                    | >32                    | 0.06                  |
| BA120                    | <i>Rv2983</i> | C152R                                    | >32                    | 0.06                  |
| KA003                    | <i>Rv2983</i> | A68E                                     | >32                    | <0.03                 |
| KA016                    | <i>Rv2983</i> | Q114R                                    | 16- >32                | 0.06-0.125            |
| BA026a                   | <i>fbiB</i>   | L15P                                     | 8-32                   | 0.06-0.125            |
| BA069                    | <i>fbiB</i>   | W397R                                    | 16                     | 0.03                  |
| BA070                    | <i>fbiB</i>   | L173P                                    | 32                     | 0.125                 |
| KA006                    | <i>fbiB</i>   | -T in aa 684                             | 32                     | 0.06-0.125            |
| BA074                    | <i>fbiA</i>   | S219G                                    | 32                     | 0.03                  |
| BA084                    | <i>fbiA</i>   | Q27*                                     | >32                    | >16                   |
| KA043                    | <i>fbiA</i>   | D49G                                     | >32                    | >16                   |
| KA058                    | <i>fbiA</i>   | -G in aa 47                              | >32                    | >16                   |
| KA067                    | <i>fbiA</i>   | L308P                                    | >32                    | >16                   |
| KA085                    | <i>fbiA</i>   | Q120P                                    | 32                     | >16                   |
| KA096                    | <i>fbiA</i>   | D286A                                    | >32                    | >16                   |
| BA017                    | <i>fbiC</i>   | C562W                                    | >32                    | >16                   |
| BA035                    | <i>fbiC</i>   | R25G                                     | 16-32                  | 0.03                  |
| BA075                    | <i>fbiC</i>   | M776T                                    | 16-32                  | 0.03                  |
| KA004                    | <i>fbiC</i>   | G194D                                    | >32                    | 1                     |
| KA014                    | <i>fbiC</i>   | -C in aa 20                              | >32                    | 2                     |
| KA017                    | <i>fbiC</i>   | K684T                                    | >32                    | >16                   |
| KA026a                   | <i>fbiC</i>   | IS6110 ins. 85bp upstream of <i>fbiC</i> | >32                    | >16                   |
| KA031                    | <i>fbiC</i>   | L377P                                    | >32                    | >16                   |
| KA073                    | <i>fbiC</i>   | A827G                                    | >32                    | >16                   |
| BA002                    | <i>fgd</i>    | K9N                                      | 32                     | 0.5                   |
| KA050                    | <i>fgd</i>    | G191D                                    | >32                    | >16                   |
| KA088                    | <i>ddn</i>    | R112W                                    | ≥32                    | >16                   |
| KA091                    | <i>ddn</i>    | IS6110 ins. in D108                      | ≥32                    | >16                   |
| KA093                    | <i>ddn</i>    | -G in aa 39                              | >32                    | >16                   |

924

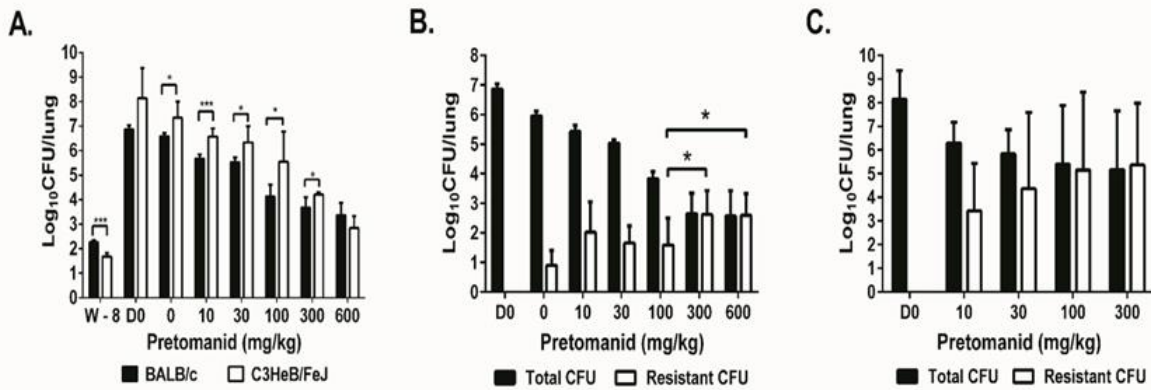

925

926 **Fig. 1. Selective amplification of spontaneous pretomanid-resistant mutants during**

927 **pretomanid monotherapy in mice is dose-dependent and is more pronounced in**

928 **C3HeB/FeJ mice.** After aerosol infection with *M. tuberculosis* H37Rv, BALB/c and C3HeB/FeJ

929 mice were treated with a range of doses of pretomanid for 8 weeks and sacrificed at different

930 time points before and after treatment for lung CFU counts. A. Mean (± S.D.) total lung CFU

931 counts on the day after infection (W-8), on the day of treatment initiation (D0), and after 3 weeks

932 of treatment with the indicated pretomanid dose (in mg/kg body weight). Dose-dependent

933 bactericidal activity was observed in both strains; B. Mean (± S.D.) total and PMD-resistant lung

934 CFU counts in BALB/c mice on day 0 and after 8 weeks of treatment with the indicated

935 pretomanid dose. Dose-dependent bactericidal activity and selection of PMD-resistant bacteria

936 was observed, with the resistant population overtaking the susceptible population at doses ≥

937 300 mg/kg; C. Mean (± S.D.) total and PMD-resistant lung CFU counts in C3HeB/FeJ mice on

938 day 0 and after 8 weeks of treatment with the indicated pretomanid dose. Dose-dependent

939 bactericidal activity and selection of PMD-resistant bacteria was observed, with the resistant

940 population overtaking the susceptible population at doses ≥ 30 mg/kg. \*  $p < 0.05$ , \*\*\*  $p < 0.001$

941

942

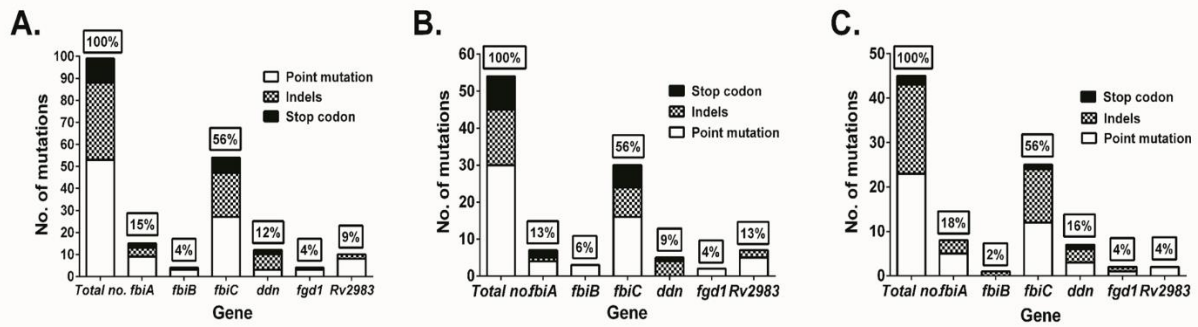

943

944 **Fig. 2. Mutation frequencies and mutation types of genes associated with pretomanid**

945 **resistance.** WGS was performed with 136 pretomanid-resistant colonies and 25 colony pools

946 picked from 47 individual mice harboring pretomanid-resistant CFU after 8 weeks of treatment.

947 99 unique mutations in these 6 genes were identified. A. Overall mutation frequencies; B.

948 Mutation frequencies and mutation types in BALB/c mice; C. Mutation frequencies and mutation

949 types in C3HeB/FeJ.

950

951

952

953



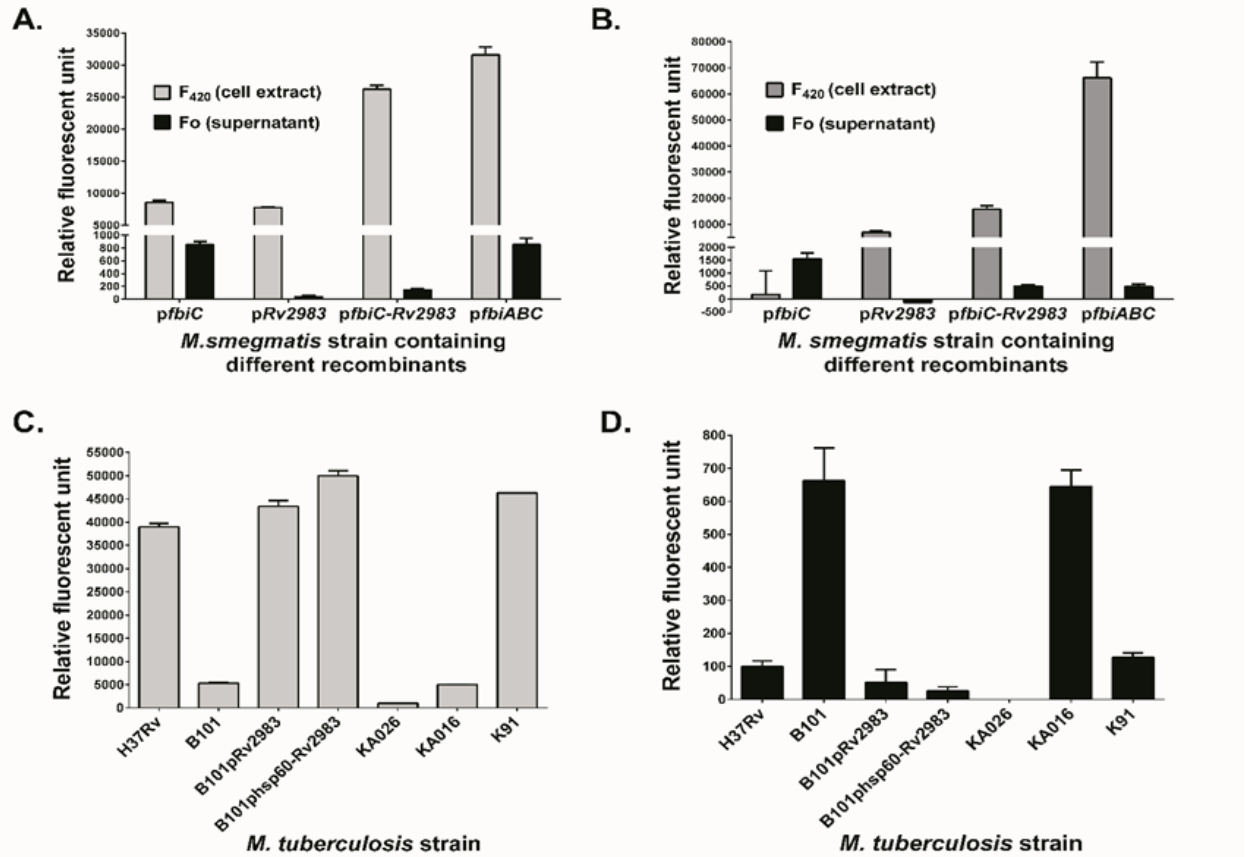

954

955 **E.**

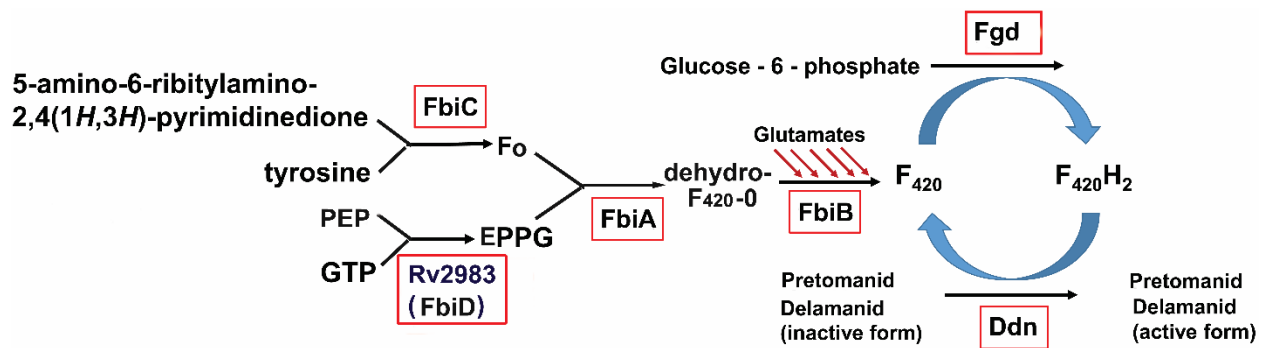

956

957

958 **Fig. 3. Rv2983 is required for efficient F<sub>420</sub> synthesis from Fo.** F<sub>420</sub> and Fo content  
 959 measured in *M. smegmatis* strains harboring different recombinants relative to the control strain  
 960 containing the empty vector pYUDDuet after 6 (A) and 26 (B) hours of 1mM IPTG induction; F<sub>420</sub>

961 (C) and Fo (D) content was measured in the *Rv2983* mutant strains of *M. tuberculosis* and the  
962 control strains including B101 ( $\Delta Rv2983$ , A198P), KA016 ( $\Delta Rv2983$ , Q114R), H37Rv (wild-type),  
963 B101 complemented strain (pMH94-*Rv2983*), B101 complemented strain (pMH94-hsp60-  
964 *Rv2983*), KA026 ( $\Delta fbiC$ , IS6110 insertion in 85-bp upstream of *fbiC*), and K91 ( $\Delta ddn$ , IS6110  
965 insertion in aa D108), after growth in 7H9 broth for 6 days. Schematic diagram (E) of proposed  
966 nitroimidazole activation pathway showing *Rv2983* as FbiD catalyzing EPPG biosynthesis. Fo,  
967 7,8-didemethyl-8-hydroxy-5-deazariboflavin; PEP, phosphoenolpyruvate; GTP, guanosine  
968 triphosphate; EPPG, enolpyruvyl-diphospho-5'-guanosine.

969

970

971

972

973

974

975

976

977

978

979

980

981

982

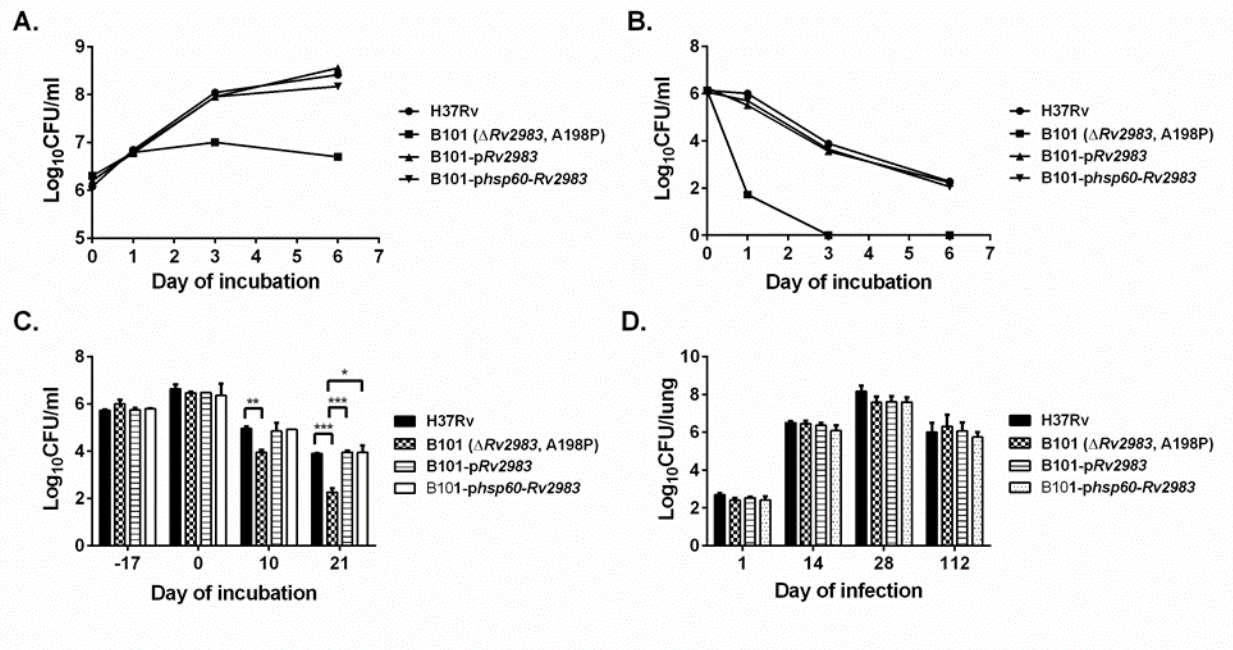

983

984

985 **Figure 4.  $F_{420}$ -deficient pretomanid-resistant *Rv2983* mutant is hypersensitive to oxidative**  
986 **stress and progressive hypoxia, but is not attenuated in BALB/c mouse lungs. A. *Mtb***  
987 **growth kinetics in 7H9 broth containing 20  $\mu\text{M}$  menadione; B. *Mtb* growth kinetics in 7H9 broth**  
988 **containing 100  $\mu\text{M}$  menadione; C. *Mtb* growth and survival under progressive hypoxia; D. Lung**  
989 **CFU counts in BALB/c mice after aerosol infection with *Mtb* strains.**

990

991

992

993

994

995

996

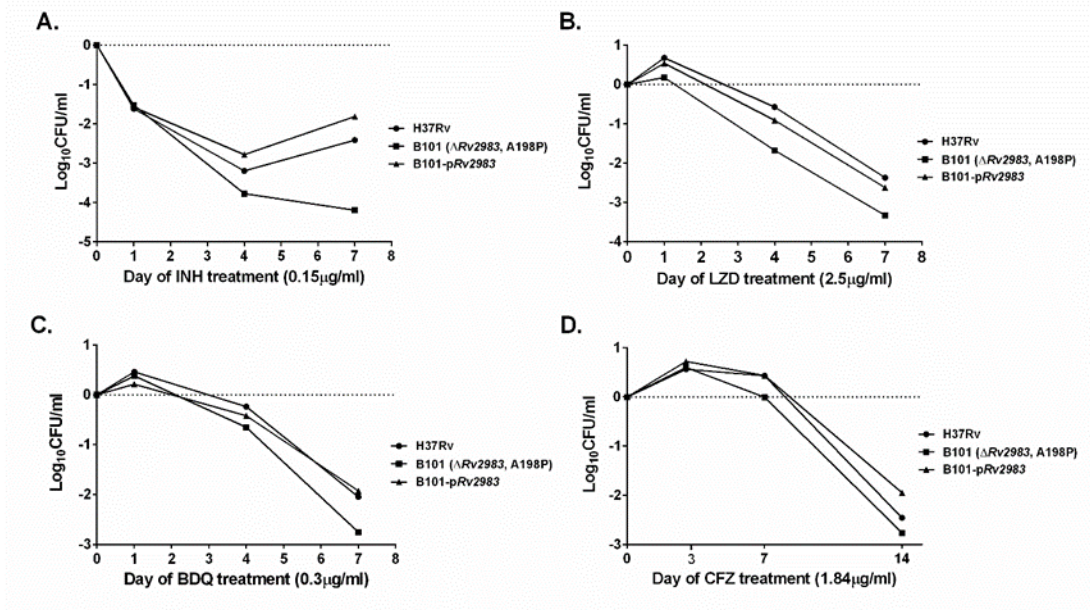

Figure 5.

997

998 **F<sub>420</sub>-deficient pretomanid-resistant Rv2983 mutant is hypersusceptible to anti-TB drugs.**

999 Time-kill kinetics was performed using *Mtb* strains in 7H9 broth containing following drugs: A.

1000 INH of 0.15 μg/ml; B. LZD of 2.5 μg/ml; C. BDQ of 0.3 μg/ml; D. CFZ of 1.84 μg/ml. The

1001 difference in CFU/ml was calculated based on the CFU/ml at each time point relative to that on

1002 day 0 (after subculture of the strains to a drug-containing medium).

1003

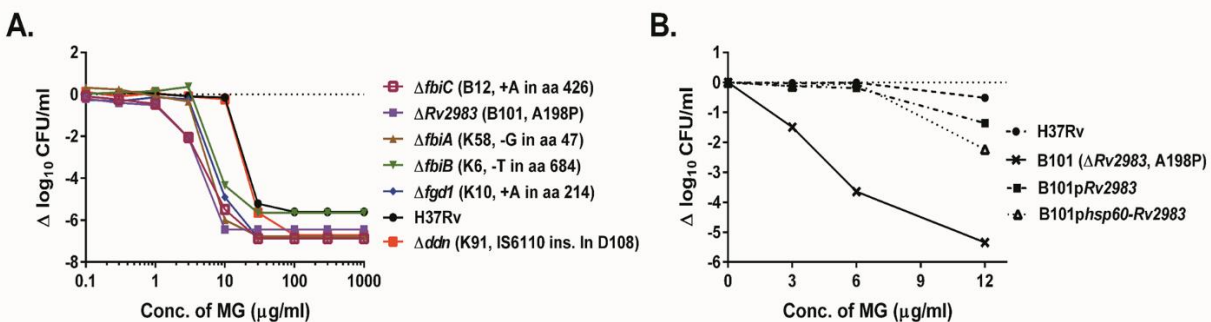

1004

1005 **Fig. 6. F<sub>420</sub>H<sub>2</sub>-deficient pretomanid-resistant mutants of *M. tuberculosis* are more**

1006 **susceptible to growth inhibition by malachite green. A. Growth of wild-type *M. tuberculosis***

1007 on 7H9 agar is inhibited by malachite green (MG) in a concentration-dependent manner. F<sub>420</sub>H<sub>2</sub>-  
1008 deficient, pretomanid-resistant *M. tuberculosis* mutants (*fbiA-C*, *fgd*, *Rv2983*) are inhibited at  
1009 lower MG concentrations relative to the wild type and the F<sub>420</sub>H<sub>2</sub>-sufficient, pretomanid-resistant  
1010 *ddn* mutant. B. Complementation of the B101 mutant with wild-type *Rv2983* restores tolerance  
1011 to MG after 28 days of incubation.

1012

1013

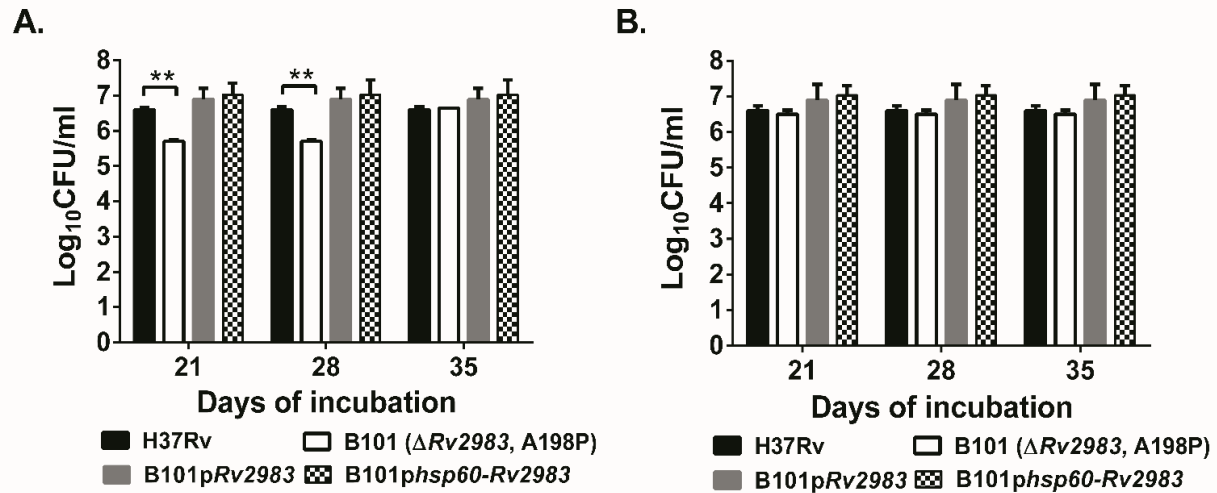

1014

1015 **C.**

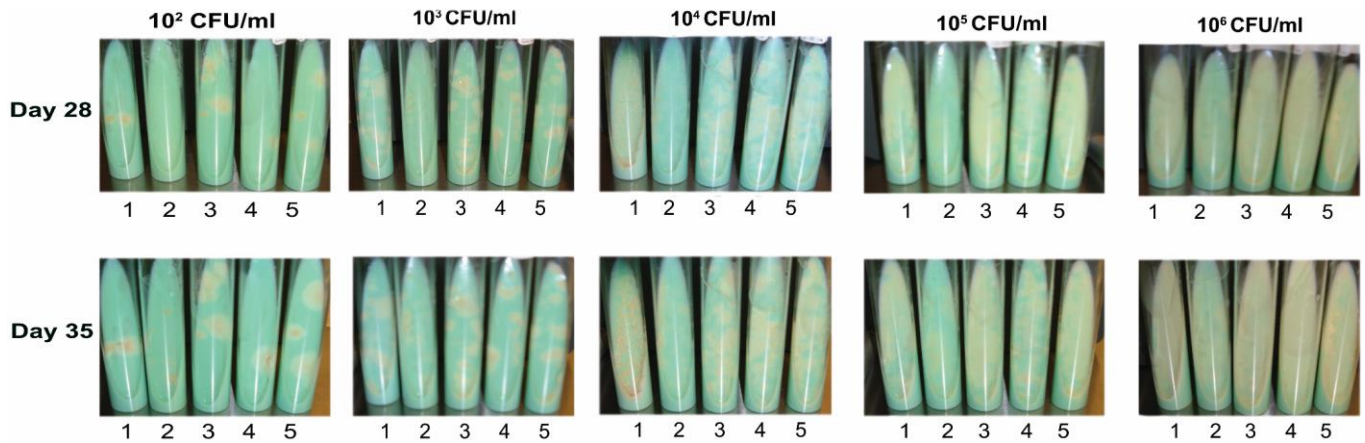

1016

1017

1018 **Fig. 7. A mutation in *Rv2983* causes growth inhibition on commercial 7H10 agar and LJ**

1019 **slants, but not on commercial 7H11 agar.** Aliquots of *M. tuberculosis* cultures were spread on

1020 various solid media purchased commercially after serial 10-fold dilutions. A-B. Mean CFU

1021 counts on 7H10 (A) and 7H11 (B) agar plates after 21, 28 and 35 days of incubation; C.

1022 Colonies on LJ slants inoculated with serially diluted aliquots after 28 and 35 days of incubation.

1023 1: H37Rv wild type; 2: B101 mutant ( $\Delta Rv2983$ , A198P); 3: B101 mutant complemented with

1024 *Rv2983* behind the native promoter; 4: B101 mutant complemented with *Rv2983* behind the

1025 *hsp60* promoter; 5. K91 mutant ( $\Delta ddn$ , IS6110 ins in D108).

1026 **SUPPLEMENTARY MATERIALS**

1027 **Table S1.** List of the primers used in the study

1028 **Table S2.** WGS results of 82 individual pretomanid-resistant colonies from BALB/c mice

1029 **Table S3.** WGS results of 54 individual pretomanid-resistant colonies from C3HeB/FeJ mice

1030 **Table S4.** WGS results of 25 pooled pretomanid-resistant isolates selected from BALB/c and

1031 C3HeB/FeJ mice

1032 **Table S5.** Distribution of mutation types and frequencies in the genes associated with

1033 pretomanid resistance BALB/c and C3HeB/FeJ mice

1034 **Figure S1.** Complementation of B101 mutant with *Rv2983*. A. Schematic diagram of genomic

1035 DNA of *M. tuberculosis* strains after digestion with restriction enzyme *Acc65I*; B. Result of

1036 southern blot confirmed expected DNA fragments after *Acc65I* digestion using DIG-labeled

1037 *Rv2983* probe (H37Rv: 6.3 kb; *Rv2983* mutant: 6.3 kb; complemented strains: 6.3 and 3.5 kb).

1038 **Figure S2.** Expression of *Rv2983* and other genes involved in nitroimidazole activation. A.

1039 Expression of *Rv2983* and other genes involved in nitroimidazole activation is higher in the

1040 *Rv2983* mutant B101 relative to the wild-type H37Rv after 4 days of incubation in 7H9 broth; B.

1041 *fbjC* expression is dramatically lower in the *fbjC* mutant KA026 relative to the wild-type after 2

1042 days of incubation in 7H9 broth; C. A faint band representing the 937-bp *fbjC* DNA fragment is

1043 evident in the sample from the KA026 mutant (lane 2) relative to that in H37Rv (lane 3). Lane 1

1044 is the 1-kb DNA marker.

1045 **Figure S3.** Complementation of the B101 mutant with wild-type *Rv2983* restores tolerance to

1046 MG.

1047 The proportional recovery of the mutant on 6 µg/ml of MG increases with the volume of culture

1048 plated and the duration of incubation: 28-day incubation of 500 µl (A) aliquots/plate; 35-day

1049 incubation of 500 µl (B) aliquots/plate.

1050 **Figure S4.** The growth kinetics of the wild-type H37Rv, the Rv2983 mutant B101 and the  
1051 complemented strains (B101-pRv2983 and B101-phsp60-RV2983) in 7H9 broth.

1052 **Figure S5.** Gross examination of aerosol-infected BALB/c mice sacrificed at different time  
1053 points.

1054 A. Body weight; B. Lung weight; C. Spleen weight.

1055 **Figure S6.** Histopathological examination of lung tissues on day 112 post-infection  
1056 (hematoxylin & eosin staining; 200X magnification).

1057

1058
